# The origin of the central dogma through conflicting multi-level selection

Nobuto Takeuchi<sup>\*1,2</sup> and Kunihiro Kaneko<sup>1,3</sup>

<sup>1</sup>Research Center for Complex Systems Biology, Graduate School of Arts and Sciences, University of Tokyo, Komaba 3-8-1, Meguro-ku, Tokyo 153-8902, Japan

<sup>2</sup>School of Biological Sciences, Faculty of Science, University of Auckland, Private Bag 92019, Auckland 1142, New Zealand

<sup>3</sup>Department of Basic Science, Graduate School of Arts and Sciences, University of Tokyo, Komaba 3-8-1, Meguro-ku, Tokyo 153-8902, Japan

The central dogma of molecular biology rests on two kinds of asymmetry between genomes and enzymes<sup>1</sup>. Information flows from genomes to enzymes, but not from enzymes to genomes: informatic asymmetry. Enzymes provide catalysis, whereas genomes do not: catalytic asymmetry. How did these asymmetries originate? Here we demonstrate that these asymmetries can spontaneously arise from conflict between selection at the molecular level and selection at the cellular level. Our model consists of a population of protocells, each containing a population of replicating catalytic molecules. The molecules are assumed to face a trade-off between serving as catalysts and serving as templates. This trade-off causes conflicting multi-level selection: serving as catalysts is favoured by cellular-level selection, whereas serving as templates is favoured by molecular-level selection. This conflict induces informatic and catalytic symmetry breaking, whereby the molecules differentiate into genomes and enzymes, hence establishing the central dogma. We show mathematically that the symmetry breaking is caused by positive feedback between

---

\*nobuto.takeuchi@auckland.ac.nz

27 **Fisher’s reproductive values and the relative impact of selection at dif-**  
28 **ferent levels. Our work proposes that the central dogma is a logical con-**  
29 **sequence of conflicting multi-level selection, hence making it no longer a**  
30 **‘dogma.’**

31 At the heart of living systems lies the distinction between genomes and enzymes—  
32 the division of labour between the transmission of genetic information and the provi-  
33 sion of chemical catalysis. However, current hypotheses about the origin of life posit  
34 that genomes and enzymes were initially undistinguished, both embodied in a single  
35 type of molecule (RNA<sup>2</sup> or its analogues<sup>3</sup>). How then did this distinction originate?

36 To address this question, we explore the possibility that the genome-enzyme  
37 distinction arose during the evolutionary transition from replicating molecules to  
38 protocells<sup>4–7</sup>. During this transition, selection operated at both molecular and cel-  
39 lular levels, and selection at one level was potentially in conflict with selection at  
40 the other. Previously, we demonstrated that such conflicting multi-level selection  
41 can induce catalytic symmetry breaking in replicating molecules<sup>8</sup>. We thus hypo-  
42 thesised that conflicting multi-level selection could also induce the evolution of the  
43 genome-enzyme distinction and, hence, the origin of the central dogma.

44 To examine this hypothesis, we consider a model with two types of replicators,  
45 denoted by P and Q. The chemical identity of P and Q is unspecified for simplicity  
46 and generality. For simplicity, we separate the origin of the genome-enzyme distinc-  
47 tion from the origin of protein translation. For generality, we formulate our model  
48 to be independent of chemical specifics (see also Supplementary Discussion 1). To  
49 examine the possibility of spontaneous symmetry breaking, we assume no a priori  
50 difference between P and Q. We assume that both P and Q can serve as templates  
51 for replication ( $P \rightarrow 2P$  and  $Q \rightarrow 2Q$ ) and transcription ( $P \rightarrow P + Q$  and  $Q \rightarrow Q + P$ ),  
52 where complementarity is ignored (Fig. 1a). Moreover, both P and Q can serve as  
53 catalysts for replication and transcription. Each replicator is individually assigned  
54 eight catalytic values denoted by  $k_{pt}^c \in [0, 1]$ , where  $c$ ,  $p$ , and  $t$  are the replicator  
55 types of catalyst, product, and template, respectively. Four of these  $k_{pt}^c$  values de-  
56 note the catalytic activities of the replicator itself, and the other four denote those  
57 of its transcripts; e.g., if a replicator is of type P, its catalytic activities are given by  
58  $k_{pt}^P$ , and those of its transcripts, which are of type Q, by  $k_{pt}^Q$ . A replicator inherits  
59  $k_{pt}^c$  values from its template with potential mutation. Mutation randomly changes  
60 each  $k_{pt}^c$  value with probability  $m$  per replication or transcription (see Methods). For  
61 simplicity, catalysts are assumed not to distinguish between different templates of  
62 the same replicator type (either because catalysts are unspecific or because templates  
63 are sufficiently similar to each other).

64 Replicators compete for a finite supply of substrate denoted by S (the abstraction

65 of monomers). The substrate is recycled through the decay of P and Q to keep  
66 the total number of P, Q, and S (hereafter, collectively called particles) constant  
67 (Fig. 1b).

68 All particles are compartmentalised into protocells, across which P and Q do  
69 not diffuse at all, but S diffuses rapidly (Fig. 1c; see Methods). This difference in  
70 diffusion induces the passive transport of S from protocells in which S is converted  
71 into replicators slowly, to protocells in which this conversion is rapid. Consequently,  
72 the latter grow at the expense of the former<sup>9</sup>. If the number of particles in a protocell  
73 exceeds threshold  $V$ , the protocell is divided with its particles randomly distributed  
74 between the two daughter cells; conversely, if this number decreases to zero, the  
75 protocell is discarded.

76 Crucial in our modelling is the incorporation of a trade-off between a replicator's  
77 catalytic activities and templating opportunities. This trade-off is considered to  
78 arise from a constraint that providing catalysis and serving as a template impose  
79 structurally-incompatible requirements on replicators<sup>10,11</sup>. Because replication or  
80 transcription takes a finite amount of time, serving as a catalyst comes at the cost  
81 of spending less time serving as a template, thereby inhibiting self-replication. To  
82 incorporate this trade-off, the model assumes that replication and transcription entail  
83 complex formation between a catalyst and template (Fig. 1b)<sup>12</sup>. The rate constants  
84 of complex formation are given by the  $k_{pt}^c$  values of a replicator serving as a catalyst.  
85 Thus, the greater the values of  $k_{pt}^c$ , the greater the chance that a replicator, or its  
86 transcript, is sequestered in a complex as a catalyst and thus unable to serve as a  
87 template.

88 The above trade-off creates a dilemma: providing catalysis brings benefit at the  
89 cellular level because it accelerates a protocell's uptake of S, but brings cost at the  
90 molecular level because it inhibits a replicator's self-replication<sup>8</sup>. Therefore, selection  
91 between protocells tends to maximise the  $k_{pt}^c$  values of replicators (i.e., cellular-level  
92 selection), whereas selection within protocells tends to minimise the  $k_{pt}^c$  values of  
93 replicators (i.e., molecular-level selection).

94 To determine the outcome of this conflicting multi-level selection, we simulated  
95 our model for various values of  $V$  (the threshold at which protocells divide) and  
96  $m$  (mutation rate). Our main result is that for sufficiently large values of  $V$  and  
97  $m$ , replicators undergo symmetry breaking in three aspects (Fig. 2a). First, one  
98 type of replicator (either P or Q) evolves high catalytic activity, whereas the other  
99 completely loses it (i.e.,  $k_{pt}^c \gg k_{pt}^{c'} \approx 0$  for  $c \neq c'$ ): catalytic symmetry breaking  
100 (Fig. 2bc). Second, templates are transcribed into catalysts, but catalysts are not  
101 reverse-transcribed into templates (i.e.,  $k_{ct}^c \gg k_{tc}^c \approx 0$ ): informatic symmetry break-  
102 ing (Fig. 2bc). Finally, the copy number of templates becomes smaller than that of

103 catalysts: numerical symmetry breaking: (Fig. 2d). This three-fold symmetry break-  
104 ing is robust to various changes in model details (see Supplementary Discussion 2  
105 and 3; Extended Data Figs. 3, 4, and 5). Below, we focus on catalytic and inform-  
106 atic symmetry breaking because they are directly related to the central dogma (see  
107 Supplementary Discussion 4 for numerical symmetry breaking).

108 The significant consequence of symmetry breaking is the resolution of the di-  
109 lemma between providing catalysis and getting replicated. Once symmetry is broken,  
110 tracking lineages reveals that the common ancestors of all replicators are almost al-  
111 ways templates (Fig. 2ef; see Methods for ancestor tracking). That is, information  
112 is transmitted almost exclusively through templates, whereas information in cata-  
113 lysts is eventually lost (i.e., catalysts have zero reproductive value). Consequently,  
114 evolution operates almost exclusively through competition between templates, inde-  
115 pendent of competition between catalysts. How the catalytic activity of catalysts  
116 evolves, therefore, depends solely on the cost and benefit to templates. On the  
117 one hand, this catalytic activity brings benefit to templates for competition across  
118 protocells. On the other hand, this activity brings no cost to templates for com-  
119 petition within a protocell (neither does it bring benefit because catalysis is equally  
120 shared among templates). Therefore, the catalytic activity of catalysts is maxim-  
121 ised by cellular-level selection, but not minimised by molecular-level selection, hence  
122 the resolution of the dilemma between catalysing and templating. Because of this  
123 resolution, symmetry breaking leads to the maintenance of high catalytic activities  
124 (Extended Data Figs. 6 and 7).

125 To understand the mechanism of the symmetry breaking, we simplified the model  
126 into mathematical equations. These equations allow us to consider all the costs and  
127 benefits involved in providing catalysis: for catalysis provided by  $c \in \{P, Q\}$ , its  
128 molecular-level cost to  $c$  (denoted by  $\gamma_c^c$ ), and its cellular-level benefits to  $t \in \{P, Q\}$   
129 (denoted by  $\beta_c^t$ ). The equations calculate the joint effects of all these costs and  
130 benefits on the evolution of the average catalytic activities of  $c$  (denoted by  $\bar{k}^c$ ). The  
131 equations are derived with the help of Price's theorem<sup>13-17</sup> and displayed below (see  
132 Methods for the derivation):

$$\begin{aligned} \Delta \bar{k}^P &\approx \bar{\omega}^P (\beta_P^P \sigma_{\text{cel}}^2 - \gamma_P^P \sigma_{\text{mol}}^2) + \bar{\omega}^Q \beta_P^Q \sigma_{\text{cel}}^2 \\ \Delta \bar{k}^Q &\approx \bar{\omega}^P \beta_Q^P \sigma_{\text{cel}}^2 + \bar{\omega}^Q (\beta_Q^Q \sigma_{\text{cel}}^2 - \gamma_Q^Q \sigma_{\text{mol}}^2), \end{aligned} \quad (1)$$

134 where  $\Delta$  denotes evolutionary change per generation,  $\bar{\omega}^c$  is the average normalised  
135 reproductive value of  $c$ ,  $\sigma_{\text{cel}}^2$  is the variance of catalytic activities among protocells  
136 (cellular-level variance), and  $\sigma_{\text{mol}}^2$  is the variance of catalytic activities within a pro-  
137 tocell (molecular-level variance).

138 The derivation of equations (1) involves various simplifications, among which  
139 the three most important are noted below (see Methods for details). First, equa-  
140 tions (1) assume that catalysts do not distinguish the replicator types of templates  
141 and products (i.e.,  $k_{pt}^c$  is independent of  $p$  and  $t$ , hence denoted by  $k^c$ ). Such distinc-  
142 tion is required for numerical symmetry breaking, which is thus excluded under this  
143 assumption. However, catalytic symmetry breaking can still occur (e.g.,  $k^P > k^Q$ ), as  
144 can informatic symmetry breaking: the trade-off between catalysing and templating  
145 causes information to flow preferentially from less catalytic to more catalytic replic-  
146 ator types. Second, equations (1) treat  $\sigma_{\text{mol}}^2$  and  $\sigma_{\text{cel}}^2$  as parameters although they  
147 are actually variables dependent on  $m$  and  $V$  in the simulation model. In addition,  
148 these variances are assumed to be identical between  $\bar{k}^P$  and  $\bar{k}^Q$ . Third, equations (1)  
149 ignore the terms of order greater than  $\sigma_{\text{cel}}^2$  and  $\sigma_{\text{mol}}^2$ <sup>16</sup>.

150 The first and second terms on the right-hand side of equations (1) represent  
151 evolution arising through the replication of P and Q, respectively, weighted by the  
152 reproductive values,  $\bar{\omega}^P$  and  $\bar{\omega}^Q$ . The terms multiplied by  $\beta_c^t \sigma_{\text{cel}}^2$  represent evolution  
153 driven by cellular-level selection; those by  $-\gamma_c^c \sigma_{\text{mol}}^2$ , evolution driven by molecular-  
154 level selection.

155 Using equations (1), we can now elucidate the mechanism of symmetry breaking.  
156 Consider a symmetric situation where P and Q are equally catalytic:  $\bar{k}^P = \bar{k}^Q$ . Since P  
157 and Q are identical, the catalytic activities of P and Q evolve identically:  $\Delta \bar{k}^P = \Delta \bar{k}^Q$ .  
158 Next, suppose that P becomes slightly more catalytic than Q for whatever reason,  
159 e.g., by genetic drift:  $\bar{k}^P > \bar{k}^Q$  (catalytic asymmetry). The trade-off between cata-  
160 lysing and templating then causes P to be replicated less frequently than Q, so that  
161  $\bar{\omega}^P < \bar{\omega}^Q$  (informatic asymmetry). Consequently, the second terms of equations (1)  
162 increase relative to the first terms. That is, for catalysis provided by P (i.e.,  $\bar{k}^P$ ),  
163 the impact of cellular-level selection through Q (i.e.,  $\bar{\omega}^Q \beta_P^Q \sigma_{\text{cel}}^2$ ) increases relative to  
164 those of molecular-level and cellular-level selection through P (i.e.,  $-\bar{\omega}^P \gamma_P^P \sigma_{\text{mol}}^2$  and  
165  $\bar{\omega}^P \beta_P^P \sigma_{\text{cel}}^2$ , respectively), resulting in the relative strengthening of cellular-level selec-  
166 tion. By contrast, for catalysis provided by Q (i.e.,  $\bar{k}^Q$ ), the impacts of molecular-level  
167 and cellular-level selection through Q (i.e.,  $-\bar{\omega}^Q \gamma_Q^Q \sigma_{\text{mol}}^2$  and  $\bar{\omega}^Q \beta_Q^Q \sigma_{\text{cel}}^2$ , respectively)  
168 increase relative to cellular-level selection through P (i.e.,  $\bar{\omega}^P \beta_Q^P \sigma_{\text{cel}}^2$ ), resulting in the  
169 relative strengthening of molecular-level selection. Consequently, a small difference  
170 between  $\bar{k}^P$  and  $\bar{k}^Q$  leads to  $\Delta \bar{k}^P > \Delta \bar{k}^Q$ , the amplification of the initial difference—  
171 hence, symmetry breaking. The above mechanism can be summarised as positive  
172 feedback between reproductive values and the relative impacts of selection at differ-  
173 ent levels.

174 To link the above analysis to the simulation model, we need to allow for the  
175 restriction on the range of  $\bar{k}^c$  (i.e.,  $\bar{k}^c \in [0, 1]$ ). This restriction can be taken into

176 account through a phase-plane analysis of equations (1), which we have performed  
177 numerically (see Methods). The results shown in Fig. 3 indicate that symmetry  
178 breaking occurs only when  $\sigma_{\text{mol}}^2/\sigma_{\text{cel}}^2$  is sufficiently large (i.e., when genetic related-  
179 ness  $R$  is sufficiently small, where  $R = \sigma_{\text{cel}}^2/(\sigma_{\text{mol}}^2 + \sigma_{\text{cel}}^2)$ <sup>17-19</sup>; see Methods). This  
180 result is consistent with the simulation model (Fig. 2a) because by the law of large  
181 numbers, cellular-level variance ( $\sigma_{\text{cel}}^2$ ) decreases relative to molecular-level variance  
182 ( $\sigma_{\text{mol}}^2$ ) as  $V$  increases<sup>8,20</sup> (see Supplementary Discussion 5 and Extended Data Fig. 8  
183 for an additional confirmation in terms of  $V$  and  $m$  instead of  $\sigma_{\text{mol}}^2/\sigma_{\text{cel}}^2$ ). This result  
184 indicates that equations (1) correctly describe the mechanism of symmetry breaking  
185 in the simulation model.

186 In summary, our results show that a positive feedback between conflicting multi-  
187 level selection and reproductive values causes symmetry breaking of replicators that  
188 establishes a division of labour between the transmission of genetic information and  
189 the provision of chemical catalysis. Such division of labour between information  
190 transmission and the other functions is a recurrent pattern throughout biological  
191 hierarchy; e.g., multicellular organisms display differentiation between germline and  
192 soma; eusocial animal colonies, queens and workers (Extended Data Table 1)<sup>4-7</sup>.  
193 Given that all these systems potentially involve conflicting multi-level selection and  
194 tend to display the respective division of labour as their sizes increase, our theory  
195 provides a basis on which to pursue a universal principle of life.

196 **Figures**

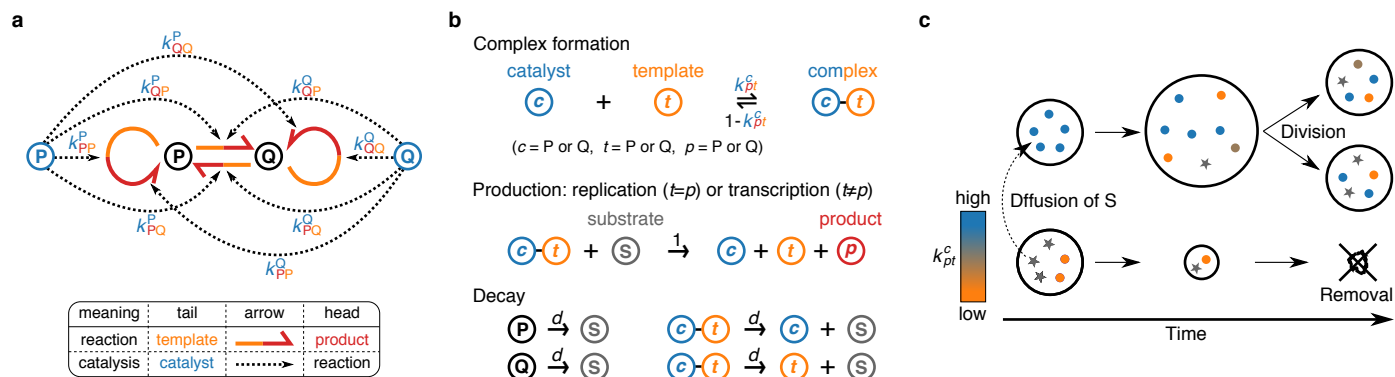

197 **Figure 1: The model.** **a**, Two types of replicators, P and Q, can serve as tem-  
198 plates and catalysts for producing either type. Circular harpoons indicate replic-  
199 ation; straight harpoons, transcription (heads indicate products; tails, templates).  
200 Dotted arrows indicate catalysis (heads indicate reaction catalysed; tails, replicators  
201 providing catalysis). **b**, Replicators undergo complex formation, replication, tran-  
202 scription, and decay. Rate constants of complex formation are given by the  $k_{pt}^c$  values  
203 of a replicator serving as a catalyst (denoted by  $c$ ). **c**, Protocells exchange substrate  
204 S (represented by stars) through rapid diffusion. They divide when the number of  
205 internal particles exceeds  $V$ . They are removed when they lose all particles. See  
206 Methods for the details of the model.



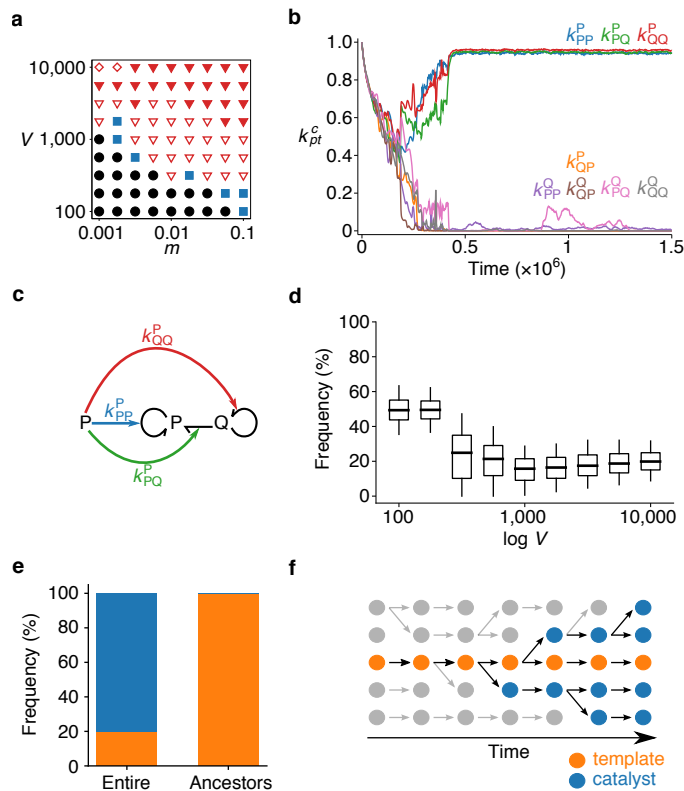

207 **Figure 2: The evolution of the central dogma.** **a**, Phase diagram: circles indic-  
 208 cate no symmetry breaking (Extended Data Fig. 1ab); squares, uncategorised (Exten-  
 209 ded Data Fig. 1cd); open triangles, incomplete symmetry breaking (Extended Data  
 210 Fig. 1e-h); filled triangles, three-fold symmetry breaking as depicted in b and c; dia-  
 211monds, catalytic and informatic symmetry breaking without numerical symmetry  
 212 breaking (Extended Data Fig. 2a). The initial condition was  $k_{pt}^c = 1$  for all replic-  
 213 ators. **b**, Dynamics of  $k_{pt}^c$  averaged over all replicators.  $V = 10000$  and  $m = 0.01$ .  
 214 **c**, Replicator evolving in b. **d**, Per-cell frequency of minority replicator types (P  
 215 or Q) at equilibrium as a function of  $V$ : boxes, quartiles; whiskers, 5th and 95th  
 216 percentiles. Only protocells containing at least  $V/2$  molecules were considered. **e**,  
 217 Frequencies of templates (orange) and catalysts (blue) in the entire population or in  
 218 the common ancestors.  $V = 3162$  and  $m = 0.01$ . **f**, Illustration of e. Circles represent  
 219 replicators; arrows, genealogy. Extinct lineages are grey. Common ancestors are  
 220 always templates, whereas the majority are catalysts.



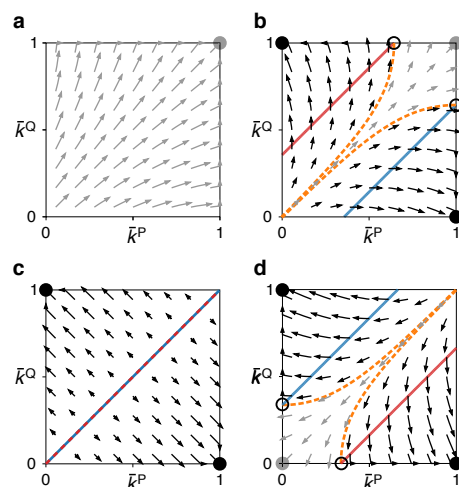

221 **Figure 3: Phase-plane portrait.** For this figure, equations (1) were adapted as  
 222 described in Methods, and  $\Delta$  was replaced with time derivative ( $\frac{d}{dt}$ ). Solid lines indic-  
 223 ate nullclines:  $\frac{d}{dt} \bar{k}^P = 0$  (red) and  $\frac{d}{dt} \bar{k}^Q = 0$  (blue). Filled circles indicate symmetric  
 224 (grey) and asymmetric (black) stable equilibria; open circles, unstable equilibria;  
 225 arrows, short-duration flows ( $\Delta\tau = 0.15$ ) leading to symmetric (grey) or asymmet-  
 226 ric (black) equilibria. Dashed lines demarcate basins of attraction. To ensure that  
 227  $0 \leq \bar{k}^c \leq 1$ ,  $\frac{d}{dt} \bar{k}^c$  is set to 0 if  $\bar{k}^c = 0$  or  $\bar{k}^c = 1$ . The nullclines at  $\bar{k}^c = 0$  and  $\bar{k}^c = 1$  are not  
 228 depicted for visibility. Parameters:  $\sigma_{\text{cel}}^2 = 1$ ,  $s = 1$ ,  $\rho_{\text{cel}} = 0$ ,  $\rho_{\text{mol}} = 0$  (see Methods). **a**,  
 229  $\sigma_{\text{mol}}^2/\sigma_{\text{cel}}^2 = 1.3$ . Cellular-level variance is so large relative to molecular-level variance  
 230 that  $\bar{k}^c$  is always maximised. **b**,  $\sigma_{\text{mol}}^2/\sigma_{\text{cel}}^2 = 1.7$ . Asymmetric equilibria emerge, but  
 231 cellular-level variance is large enough to make  $\bar{k}^P = \bar{k}^Q = 1$  stable. **c**,  $\sigma_{\text{mol}}^2/\sigma_{\text{cel}}^2 = 2.0$ .  
 232 The tipping point. **d**,  $\sigma_{\text{mol}}^2/\sigma_{\text{cel}}^2 = 2.4$ . Cellular-level variance is small enough to make  
 233  $\bar{k}^P = \bar{k}^Q = 1$  unstable. The asymmetric equilibria can be reached if  $\bar{k}^P \approx \bar{k}^Q \approx 1$ .

## 234 Methods

### 235 The model.

236 The model treats each molecule as a distinct individual with uniquely-assigned  $k_{pt}^c$   
237 variables. One time step of the model consists of three sub-steps: reaction, diffusion,  
238 and cell division.

239 In the reaction step, the reactions depicted in Fig. 1b are simulated with the  
240 algorithm described previously<sup>8</sup>. The rate constants of complex formation are given  
241 by the  $k_{pt}^c$  values of a replicator serving as a catalyst. For example, if two replicators,  
242 denoted by  $X$  and  $Y$ , serve as a catalyst and template, respectively, the rate constant  
243 of complex formation is the  $k_{py}^x$  value of  $X$ , where  $x$ ,  $y$ , and  $p$  are the replicator types  
244 of  $X$ ,  $Y$ , and product, respectively. If  $X$  and  $Y$  switch the roles (i.e.,  $X$  serves as a  
245 template, and  $Y$  serves as a catalyst), the rate constant of complex formation is the  
246  $k_{px}^y$  value of  $Y$ . Therefore,  $X$  and  $Y$  can form four distinct complexes depending on  
247 which replicator serves as a catalyst ( $X$  or  $Y$ ) and which type of replicator is being  
248 produced ( $p = P$  or  $p = Q$ ).

249 The above rule about complex formation implies that whether a template is  
250 replicated ( $p = t$ ) or transcribed ( $p \neq t$ ) depends entirely on the  $k_{pt}^c$  values of a  
251 catalyst. In other words, a template cannot control how its information is used by  
252 a catalyst. Thus, the rule excludes the possibility that a template maximises its  
253 fitness by biasing catalysts towards replication rather than transcription. Excluding  
254 this possibility is legitimate if the backbone of a template does not determine the  
255 backbone of a product as in nucleic acid polymerisation.

256 In addition, the above rule about complex formation implies that replicators  
257 multiply fastest if their  $k_{pt}^c$  values are maximised for all combinations of  $c$ ,  $p$ , and  $t$   
258 (this is because  $X$  and  $Y$  form a complex at a rate proportional to  $\sum_p k_{py}^x + k_{px}^y$  if all  
259 possible complexes are considered). Therefore, all  $k_{pt}^c$  values of replicators tend to be  
260 maximised by cellular-level selection. If all  $k_{pt}^c$  values are maximised, P and Q coexist.  
261 Thus, coexistence between P and Q is favoured by cellular-level selection, a situation  
262 that might not always be the case in reality. We ascertained that this specific aspect  
263 of the model does not critically affect results by examining an alternative model in  
264 which coexistence between P and Q is neutral with respect to cellular-level selection  
265 (see Supplementary Discussion 2).

266 In the diffusion step, all substrate molecules are randomly re-distributed among  
267 protocells with probabilities proportional to the number of replicators in protocells.  
268 In other words, the model assumes that substrate diffuses extremely rapidly.

269 In the cell-division step, every protocell containing more than  $V$  particles (i.e. P,

270 Q, and S together) is divided as described in the main text.

271 The mutation of  $k_{pt}^c$  is modelled as unbiased random walks. With a probability  $m$   
272 per replication or transcription, each  $k_{pt}^c$  value of a replicator is mutated by adding  
273 a number randomly drawn from a uniform distribution on the interval  $(-\delta_{\text{mut}}, \delta_{\text{mut}})$   
274 ( $\delta_{\text{mut}} = 0.05$  unless otherwise stated). The values of  $k_{pt}^c$  are bounded above by  $k_{\text{max}}$   
275 with a reflecting boundary ( $k_{\text{max}} = 1$  unless otherwise stated), but are not bounded  
276 below to remove the boundary effect at  $k_{pt}^c = 0$ . However, if  $k_{pt}^c < 0$ , the respective  
277 rate constant of complex formation is regarded as zero.

278 We ascertained that the above specific model of mutation does not critically affect  
279 results by testing two alternative models of mutation. One model is nearly the same  
280 as the above, except that the boundary condition at  $k_{pt}^c = 0$  was set to reflecting.  
281 The other model implements mutation as unbiased random walks on a logarithmic  
282 scale. The details are described in Supplementary Discussion 3.

283 Each simulation was run for at least  $5 \times 10^7$  time steps (denoted by  $t_{\text{min}}$ ) unless  
284 otherwise stated, where the unit of time is defined as that in which one replicator  
285 decays with probability  $d$  (thus, the average lifetime of replicators is  $1/d$  time steps).  
286 The value of  $d$  was set to 0.02. The total number of particles in the model  $N_{\text{tot}}$   
287 was set to  $50V$  so that the number of protocells was approximately 100 irrespective  
288 of the value of  $V$ . At the beginning of each simulation, 50 protocells of equal size  
289 were generated. The initial values of  $k_{pt}^c$  were set to  $k_{\text{max}}$  for every replicator unless  
290 otherwise stated. The initial frequencies of P and Q were equal, and that of S was  
291 zero.

## 292 Ancestor tracking.

293 Common ancestors of replicators were obtained in two steps. First, ancestor tracking  
294 was done at the cellular level to obtain the common ancestors of all surviving pro-  
295 tocells. Second, ancestor tracking was done at the molecular level for the replicators  
296 contained by the common ancestors of protocells obtained in the first step. The res-  
297 ults shown in Fig. 2e were obtained from the data between  $2.1 \times 10^7$  and  $2.17 \times 10^7$  time  
298 steps, so that the ancestor distribution was from after the completion of symmetry  
299 breaking.

## 300 The derivation of equations (1).

301 To derive equations (1), we simplified the simulation model in two ways. First, we  
302 assumed that  $k_{pt}^c$  is independent of  $p$  and  $t$ . Under this assumption, a catalyst does  
303 not distinguish the replicator types of templates (i.e.,  $k_{pt}^c = k_{pt'}^c$  for  $t \neq t'$ ) and products

304 (i.e.,  $k_{pt}^c = k_{p't}^c$  for  $p \neq p'$ ). As described in the main text, this assumption excludes the  
 305 possibility of numerical symmetry breaking, but still allows catalytic and informatic  
 306 symmetry breaking.

307 Second, we abstracted away chemical reactions by defining  $\omega_{ij}^t$  as the probability  
 308 that replicator  $j$  of type  $t$  in protocell  $i$  is replicated or transcribed per unit time.  
 309 Let  $n_{ij}^t(\tau)$  be the population size of this replicator at time  $\tau$ . Then, the dynamics of  
 310  $n_{ij}^t(\tau)$  can be mathematically described as

$$311 \quad \begin{bmatrix} n_{ij}^P(\tau + 1) \\ n_{ij}^Q(\tau + 1) \end{bmatrix} = \begin{bmatrix} \omega_{ij}^P & \omega_{ij}^Q \\ \omega_{ij}^P & \omega_{ij}^Q \end{bmatrix} \begin{bmatrix} n_{ij}^P(\tau) \\ n_{ij}^Q(\tau) \end{bmatrix}. \quad (2)$$

312 The fitness of the replicator can be defined as the dominant eigenvalue  $\lambda_{ij}$  of the  $2 \times 2$   
 313 matrix on the right-hand side of equation (2). The equilibrium frequencies of P and Q  
 314 are given by the right eigenvector  $\mathbf{v}_{ij}$  associated with  $\lambda_{ij}$ . Fisher's reproductive values  
 315 of P and Q are given by the corresponding left eigenvector  $\mathbf{u}_{ij}$ . These eigenvalue and  
 316 eigenvectors are calculated as follows:

$$317 \quad \lambda_{ij} = \omega_{ij}^P + \omega_{ij}^Q, \quad \mathbf{v}_{ij} = \begin{bmatrix} 1 \\ 1 \end{bmatrix}, \quad \mathbf{u}_{ij} = [\omega_{ij}^P \quad \omega_{ij}^Q]. \quad (3)$$

318

319 Based on the above simplification, we now derive equations (1). For concreteness,  
 320 we focus on the evolution of the average catalytic activity of P (denoted by  $\bar{k}^P$  in  
 321 the main text). However, the same method of derivation is applicable to that of Q  
 322 if P and Q are swapped.

323 Let  $\kappa_{ij}^P$  be the catalytic activity of replicator  $j$  of type P in protocell  $i$  (we use  $\kappa$   
 324 instead of  $k$  to distinguish  $\kappa_{ij}^P$  from  $k_{pt}^P$ ). Price's equation<sup>14,15</sup> states that

$$325 \quad \langle \lambda_{\tilde{i}\tilde{j}} \rangle \Delta \langle \kappa_{\tilde{i}\tilde{j}}^P \rangle = \sigma_{\tilde{i}}^2 [\langle \lambda_{\tilde{i}\tilde{j}} \rangle, \langle \kappa_{\tilde{i}\tilde{j}}^P \rangle] + \mathbb{E}_{\tilde{i}} [\sigma_{\tilde{i}\tilde{j}}^2 [\lambda_{ij}, \kappa_{ij}^P]] \quad (4)$$

326 where  $\langle x_{\tilde{i}\tilde{j}} \rangle$ ,  $\langle x_{\tilde{i}\tilde{j}} \rangle$ , and  $\mathbb{E}_{\tilde{i}}[x]$  are  $x$  averaged over the indices marked with tildes,  
 327  $\sigma_{\tilde{i}}^2[x, y]$  is the covariance between  $x$  and  $y$  over protocells, and  $\sigma_{\tilde{i}\tilde{j}}^2[x, y]$  is the cov-  
 328 ariance between  $x$  and  $y$  over the replicators in protocell  $i$  (one replicator is always  
 329 counted as one sample in calculating all moments). Below, we show that equations (1)  
 330 approximate equation (4) up to the second moments of  $\kappa^P$ , viz.,  $\sigma_{\tilde{i}}^2[\langle \kappa_{\tilde{i}\tilde{j}}^P \rangle, \langle \kappa_{\tilde{i}\tilde{j}}^P \rangle]$  and  
 331  $\mathbb{E}_{\tilde{i}}[\sigma_{\tilde{i}\tilde{j}}^2[\kappa_{ij}^P, \kappa_{ij}^P]]$ .

332 To approximate the first term on the right-hand side of equation (4), we assume  
 333 that  $\langle \lambda_{\tilde{i}\tilde{j}} \rangle$  is a function of  $\langle \kappa_{\tilde{i}\tilde{j}}^P \rangle$  and  $\langle \kappa_{\tilde{i}\tilde{j}}^Q \rangle$  that can be expanded as a Taylor series

334 around  $\langle \kappa_{ij}^P \rangle$  and  $\langle \kappa_{ij}^Q \rangle$ . Substituting this series into  $\sigma_i^2[\langle \lambda_{ij} \rangle, \langle \kappa_{ij}^P \rangle]$ , we obtain

$$335 \quad \sigma_i^2[\langle \lambda_{ij} \rangle, \langle \kappa_{ij}^P \rangle] = \sum_{c \in \{P, Q\}} \frac{\partial \langle \lambda_{ij} \rangle}{\partial \langle \kappa_{ij}^c \rangle} \sigma_i^2[\langle \kappa_{ij}^P \rangle, \langle \kappa_{ij}^c \rangle] + O(\sigma_i^3), \quad (5)$$

336 where  $O(\sigma_i^3)$  consists of terms involving the third or higher (mixed) central moments  
337 of  $\langle \kappa_{ij}^P \rangle$  and  $\langle \kappa_{ij}^Q \rangle$  over protocells<sup>16</sup>.

338 To approximate the second term on the right-hand side of equation (4), we like-  
339 wise assume that  $\lambda_{ij}$  is a function of  $\kappa_{ij}^P$  and  $\kappa_{ij}^Q$  that can be expanded as a Taylor  
340 series around  $\langle \kappa_{ij}^P \rangle$  and  $\langle \kappa_{ij}^Q \rangle$ . Substituting this series into  $\sigma_{ij}^2[\lambda_{ij}, \kappa_{ij}^P]$ , we obtain

$$341 \quad \sigma_{ij}^2[\lambda_{ij}, \kappa_{ij}^P] = \sum_{c \in \{P, Q\}} \frac{\partial \lambda_{ij}}{\partial \kappa_{ij}^c} \sigma_{ij}^2[\kappa_{ij}^P, \kappa_{ij}^c] + O(\sigma_{ij}^3),$$

342 where  $O(\sigma_{ij}^3)$  consists of terms involving the third or higher (mixed) central moments  
343 of  $\kappa_{ij}^P$  and  $\kappa_{ij}^Q$  over the replicators in protocell  $i$ <sup>16</sup>. Applying  $\mathbb{E}_i$  to both sides of the  
344 above equation and assuming that  $\partial \lambda_{ij} / \partial \kappa_{ij}^c$  is independent of  $\sigma_{ij}^2[\kappa_{ij}^P, \kappa_{ij}^c]$ , we obtain

$$345 \quad \mathbb{E}_i[\sigma_{ij}^2[\lambda_{ij}, \kappa_{ij}^P]] = \sum_{c \in \{P, Q\}} \mathbb{E}_i \left[ \frac{\partial \lambda_{ij}}{\partial \kappa_{ij}^c} \right] \mathbb{E}_i[\sigma_{ij}^2[\kappa_{ij}^P, \kappa_{ij}^c]] + \mathbb{E}_i[O(\sigma_{ij}^3)]. \quad (6)$$

346 Substituting equations (5) and (6) into equation (4), we obtain

$$347 \quad \Delta \langle \kappa_{ij}^P \rangle = \frac{1}{\langle \lambda_{ij} \rangle} \sum_{c \in \{P, Q\}} \left( \frac{\partial \langle \lambda_{ij} \rangle}{\partial \langle \kappa_{ij}^c \rangle} \sigma_i^2[\langle \kappa_{ij}^P \rangle, \langle \kappa_{ij}^c \rangle] + \mathbb{E}_i \left[ \frac{\partial \lambda_{ij}}{\partial \kappa_{ij}^c} \right] \mathbb{E}_i[\sigma_{ij}^2[\kappa_{ij}^P, \kappa_{ij}^c]] \right) + O', \quad (7)$$

348 where  $O' = O(\sigma_i^3) + E_i[O(\sigma_{ij}^3)]$ .

349 Next, we assume that covariances between  $\kappa^P$  and  $\kappa^Q$ , namely,  $\sigma_i^2[\langle \kappa_{ij}^P \rangle, \langle \kappa_{ij}^Q \rangle]$   
350 and  $\mathbb{E}_i[\sigma_{ij}^2[\kappa_{ij}^P, \kappa_{ij}^Q]]$ , are negligible because the mutation of  $\kappa_{ij}^P$  and that of  $\kappa_{ij}^Q$  are  
351 uncorrelated in the simulation model (this assumption is alternatively justified in the  
352 next section). Under this assumption, equation (7) is transformed into

$$353 \quad \Delta \langle \kappa_{ij}^P \rangle = \frac{1}{\langle \lambda_{ij} \rangle} \left( \frac{\partial \langle \lambda_{ij} \rangle}{\partial \langle \kappa_{ij}^P \rangle} \sigma_i^2[\langle \kappa_{ij}^P \rangle, \langle \kappa_{ij}^P \rangle] + \mathbb{E}_i \left[ \frac{\partial \lambda_{ij}}{\partial \kappa_{ij}^P} \right] \mathbb{E}_i[\sigma_{ij}^2[\kappa_{ij}^P, \kappa_{ij}^P]] \right) + O'. \quad (8)$$

354 Using equation (3) (i.e.,  $\lambda_{ij} = \omega_{ij}^P + \omega_{ij}^Q$ ), we can transform equation (8) into

$$355 \quad \Delta \langle \kappa_{ij}^P \rangle = \frac{1}{\langle \lambda_{ij} \rangle} \sum_{t \in \{P, Q\}} \left( \frac{\partial \langle \omega_{ij}^t \rangle}{\partial \langle \kappa_{ij}^P \rangle} \sigma_i^2[\langle \kappa_{ij}^P \rangle, \langle \kappa_{ij}^P \rangle] + \mathbb{E}_i \left[ \frac{\partial \omega_{ij}^t}{\partial \kappa_{ij}^P} \right] \mathbb{E}_i[\sigma_{ij}^2[\kappa_{ij}^P, \kappa_{ij}^P]] \right) + O'. \quad (9)$$

356 Moreover, it can be shown that

$$\begin{aligned}
 \mathbb{E}_{\bar{i}} \left[ \frac{\partial \omega_{ij}^t}{\partial \kappa_{ij}^c} \Bigg|_{\substack{\kappa_{ij}^P = \langle \kappa_{ij}^P \rangle \\ \kappa_{ij}^Q = \langle \kappa_{ij}^Q \rangle}} \right] &= \mathbb{E}_{\bar{i}} \left[ \omega_{ij}^t (\langle \kappa_{ij}^P \rangle, \langle \kappa_{ij}^Q \rangle) \frac{\partial \ln \omega_{ij}^t}{\partial \kappa_{ij}^c} \Bigg|_{\substack{\kappa_{ij}^P = \langle \kappa_{ij}^P \rangle \\ \kappa_{ij}^Q = \langle \kappa_{ij}^Q \rangle}} \right] \\
 &= \mathbb{E}_{\bar{i}} [\omega_{ij}^t (\langle \kappa_{ij}^P \rangle, \langle \kappa_{ij}^Q \rangle)] \mathbb{E}_{\bar{i}} \left[ \frac{\partial \ln \omega_{ij}^t}{\partial \kappa_{ij}^c} \Bigg|_{\substack{\kappa_{ij}^P = \langle \kappa_{ij}^P \rangle \\ \kappa_{ij}^Q = \langle \kappa_{ij}^Q \rangle}} \right] + O(\sigma_i^2) \\
 &= \langle \omega_{ij}^t \rangle \mathbb{E}_{\bar{i}} \left[ \frac{\partial \ln \omega_{ij}^t}{\partial \kappa_{ij}^c} \Bigg|_{\substack{\kappa_{ij}^P = \langle \kappa_{ij}^P \rangle \\ \kappa_{ij}^Q = \langle \kappa_{ij}^Q \rangle}} \right] + \mathbb{E}_{\bar{i}} [O(\sigma_{ij}^2)] + O(\sigma_i^2).
 \end{aligned}$$

357

358 Using the above equation, we can transform equation (9) into

$$\Delta \langle \kappa_{ij}^P \rangle = \sum_{t \in \{P, Q\}} \frac{\langle \omega_{ij}^t \rangle}{\langle \lambda_{ij}^{\bar{i}} \rangle} \left( \frac{\partial \ln \langle \omega_{ij}^t \rangle}{\partial \langle \kappa_{ij}^P \rangle} \sigma_i^2 [\langle \kappa_{ij}^P \rangle, \langle \kappa_{ij}^P \rangle] + \mathbb{E}_{\bar{i}} \left[ \frac{\partial \ln \omega_{ij}^t}{\partial \kappa_{ij}^P} \right] \mathbb{E}_{\bar{i}} [\sigma_{ij}^2 [\kappa_{ij}^P, \kappa_{ij}^P]] \right) + O'',$$

359

360 where  $O'' = O' + O(\sigma_i^2) \mathbb{E}_{\bar{i}} [O(\sigma_{ij}^2)] + \mathbb{E}_{\bar{i}} [O(\sigma_{ij}^2)] \mathbb{E}_{\bar{i}} [O(\sigma_{ij}^2)]$ .

361 We adopt the following notation:

$$\begin{aligned}
 \bar{\omega}^t &= \frac{\langle \omega_{ij}^t \rangle}{\langle \lambda_{ij}^{\bar{i}} \rangle}, & \sigma_{\text{cel}}^2 &= \sigma_i^2 [\langle \kappa_{ij}^P \rangle, \langle \kappa_{ij}^P \rangle], & \sigma_{\text{mol}}^2 &= \mathbb{E}_{\bar{i}} [\sigma_{ij}^2 [\kappa_{ij}^P, \kappa_{ij}^P]], \\
 \bar{k}^P &= \langle \kappa_{ij}^P \rangle, & \gamma_P^P &= -\mathbb{E}_{\bar{i}} \left[ \frac{\partial \ln \omega_{ij}^P}{\partial \kappa_{ij}^P} \right], & \beta_P^t &= \frac{\partial \ln \langle \omega_{ij}^t \rangle}{\partial \langle \kappa_{ij}^P \rangle},
 \end{aligned}$$

362

363

364

365 where  $\bar{\omega}^t$  is the normalised average reproductive value of type- $t$  replicators,  $\sigma_{\text{cel}}^2$ ,  
 366  $\sigma_{\text{mol}}^2$ , and  $\bar{k}^P$  are the simplification of the notation,  $\gamma_P^P$  is an average decrease in  
 367 the replication rate of a type-P replicator due to an increase in its own catalytic  
 368 activity, and  $\beta_P^t$  is an increase in the average replication rate of type- $t$  replicators in  
 369 a protocell due to an increase in the average catalytic activity of type-P replicators  
 370 in that protocell.

371 We assume that  $V$  is so large that  $\langle \kappa_{ij}^P \rangle$  and  $\kappa_{ij}^P$  can be regarded as mathematically  
 372 independent of each other, provided  $i$  and  $j$  are fixed (if  $i$  and  $j$  are varied,  $\langle \kappa_{ij}^P \rangle$  and  
 373  $\kappa_{ij}^P$  may be statistically dependent). Under this assumption, increasing  $\kappa_{ij}^P$  does not  
 374 increase  $\langle \kappa_{ij}^P \rangle$ , so that  $\gamma_P^P$  reflects only the cost of providing catalysis at the molecular  
 375 level. Likewise, increasing  $\langle \kappa_{ij}^P \rangle$  does not increase  $\kappa_{ij}^P$ , so that  $\beta_P^t$  reflects only the  
 376 benefit of receiving catalysis at the cellular level. Moreover, the independence of

377  $\langle \kappa_{ij}^P \rangle$  from  $\kappa_{ij}^P$  implies that  $\partial \omega_{ij}^Q / \partial \kappa_{ij}^P = 0$ , which permits the following interpretation:  
 378 if a replicator of type P provides more catalysis, its transcripts, which is of type Q,  
 379 pay no extra cost (i.e.,  $\gamma_P^Q = 0$ ).

380 Using the above notation and the fact that  $\partial \omega_{ij}^Q / \partial \kappa_{ij}^P = 0$ , we can transform  
 381 equation (10) into

$$382 \quad \Delta \bar{k}^P \approx \bar{\omega}^P (b_P^P \sigma_{\text{cel}}^2 - \gamma_P^P \sigma_{\text{mol}}^2) + \bar{\omega}^Q b_P^Q \sigma_{\text{cel}}^2,$$

383 where  $O''$  is omitted.

384 To derive the equation for  $\Delta \bar{k}^Q$  (i.e.,  $\Delta \langle \kappa_{ij}^Q \rangle$ ), we swap P and Q in the above deriv-  
 385 ation. Moreover, we assume that  $\sigma_i^2[\langle \kappa_{ij}^Q \rangle, \langle \kappa_{ij}^Q \rangle] = \sigma_i^2[\langle \kappa_{ij}^P \rangle, \langle \kappa_{ij}^P \rangle]$  and  $\mathbb{E}_i[\sigma_{ij}^2[\kappa_{ij}^Q, \kappa_{ij}^Q]] =$   
 386  $\mathbb{E}_i[\sigma_{ij}^2[\kappa_{ij}^P, \kappa_{ij}^P]]$  because no difference is a priori assumed between P and Q.

### 387 The phase-plane analysis.

388 To perform the phase-plane analysis depicted in Fig. 3, we adapted equations (1) by  
 389 defining  $\omega_{ij}^t$  as a specific function of  $\kappa_{ij}^t$ . (see the previous section for the meaning of  
 390  $\omega_{ij}^t$  and  $\kappa_{ij}^t$ ). The following definition was employed:

$$391 \quad \omega_{ij}^t = e^{\langle \kappa_{ij}^P \rangle + \langle \kappa_{ij}^Q \rangle} \frac{e^{-s\kappa_{ij}^t}}{\langle e^{-s\kappa_{ij}^P} \rangle + \langle e^{-s\kappa_{ij}^Q} \rangle}. \quad (11)$$

392 where the factor  $e^{\langle \kappa_{ij}^P \rangle + \langle \kappa_{ij}^Q \rangle}$  represents the cellular-level benefit of catalysis provided by  
 393 the replicators in protocell  $i$ , the numerator  $e^{-s\kappa_{ij}^t}$  represents the molecular-level cost  
 394 of catalysis provided by the focal replicator, the denominator  $1/(\langle e^{-s\kappa_{ij}^P} \rangle + \langle e^{-s\kappa_{ij}^Q} \rangle)$   
 395 normalises the cost, and  $s$  is the cost-benefit ratio. The above definition of  $\omega_{ij}^t$   
 396 was chosen to satisfy the requirement that a replicator faces the trade-off between  
 397 providing catalysis and serving as a template, so that  $\gamma_t^t$  and  $\beta_c^t$  are positive (e.g.,  
 398 if the cost  $\gamma_t^t$  were negative, it would actually be a benefit, so that there would be  
 399 no trade-off). This requirement is satisfied if  $\partial \omega_{ij}^t / \partial \kappa_{ij}^t < 0$  and  $\partial \langle \omega_{ij}^t \rangle / \partial \langle \kappa_{ij}^c \rangle > 0$  for  
 400  $c = t$  and  $c \neq t$ . Apart from this requirement, the definition was arbitrarily chosen for  
 401 simplicity.

402 Under the definition of  $\omega_{ij}^t$  in equation (11), we obtain equations describing the  
 403 evolution of  $\langle \kappa_{ij}^c \rangle$  (denoted as  $\bar{k}^c$  in the main text) as follows. Since the evolution  
 404 of  $\langle \kappa_{ij}^c \rangle$  is described by equation (7), we substitute equation (11) into equation (7).  
 405 For this substitution, we need to calculate the derivatives of fitness. According to



406 equation (3), the fitness of a replicator is  $\lambda_{ij} = \omega_{ij}^P + \omega_{ij}^Q$ . Therefore,

$$407 \quad \mathbb{E}_{\bar{i}} \left[ \frac{\partial \lambda_{ij}}{\partial \kappa_{ij}^c} \Bigg|_{\substack{\kappa_{ij}^P = \langle \kappa_{ij}^P \rangle \\ \kappa_{ij}^Q = \langle \kappa_{ij}^Q \rangle}} \right] = \mathbb{E}_{\bar{i}} \left[ -ce^{\langle \kappa_{ij}^P \rangle + \langle \kappa_{ij}^Q \rangle} \frac{e^{-s\langle \kappa_{ij}^c \rangle}}{\langle e^{-s\kappa_{ij}^P} \rangle + \langle e^{-s\kappa_{ij}^Q} \rangle}} \right]$$

$$= -ce^{\langle \kappa_{ij}^P \rangle + \langle \kappa_{ij}^Q \rangle} \frac{e^{-s\langle \kappa_{ij}^c \rangle}}{e^{-s\langle \kappa_{ij}^P \rangle} + e^{-s\langle \kappa_{ij}^Q \rangle}} + \mathbb{E}_{\bar{i}} [O(\sigma_{\bar{i}}^2)] + O(\sigma_{\bar{i}}^2).$$

408 Moreover, the average fitness of replicators in a protocell is  $\langle \lambda_{\bar{i}\bar{j}} \rangle = e^{\langle \kappa_{\bar{i}\bar{j}}^P \rangle + \langle \kappa_{\bar{i}\bar{j}}^Q \rangle}$ , so

$$409 \quad \frac{\partial \langle \lambda_{\bar{i}\bar{j}} \rangle}{\partial \langle \kappa_{\bar{i}\bar{j}}^c \rangle} \Bigg|_{\substack{\langle \kappa_{\bar{i}\bar{j}}^P \rangle = \langle \kappa_{\bar{i}\bar{j}}^P \rangle \\ \langle \kappa_{\bar{i}\bar{j}}^Q \rangle = \langle \kappa_{\bar{i}\bar{j}}^Q \rangle}} = e^{\langle \kappa_{\bar{i}\bar{j}}^P \rangle + \langle \kappa_{\bar{i}\bar{j}}^Q \rangle}.$$

410 We substitute these derivatives into equation (7) and use the fact that

$$411 \quad \langle \lambda_{\bar{i}\bar{j}} \rangle = e^{\langle \kappa_{\bar{i}\bar{j}}^P \rangle + \langle \kappa_{\bar{i}\bar{j}}^Q \rangle} + O(\sigma_{\bar{i}}^2)$$

412 to obtain

$$413 \quad \Delta \langle \kappa_{\bar{i}\bar{j}}^c \rangle = (1 + \rho_{\text{cel}}) \sigma_{\text{cel}}^2 - s \frac{e^{-s\langle \kappa_{\bar{i}\bar{j}}^c \rangle} + \rho_{\text{mol}} e^{-s\langle \kappa_{\bar{i}\bar{j}}^{c'} \rangle}}{e^{-s\langle \kappa_{\bar{i}\bar{j}}^P \rangle} + e^{-s\langle \kappa_{\bar{i}\bar{j}}^Q \rangle}} \sigma_{\text{mol}}^2 + O'' , \quad (12)$$

414 where  $c' \neq c$ ,  $\rho_{\text{cel}}$  is the correlation coefficient between  $\langle \kappa_{\bar{i}\bar{j}}^P \rangle$  and  $\langle \kappa_{\bar{i}\bar{j}}^Q \rangle$  (i.e.,  $\rho_{\text{cel}} =$   
 415  $\sigma_{\bar{i}}^2 [\langle \kappa_{\bar{i}\bar{j}}^P \rangle, \langle \kappa_{\bar{i}\bar{j}}^Q \rangle] / \sigma_{\text{cel}}^2$ ), and  $\rho_{\text{mol}}$  is the average correlation coefficient between  $\kappa_{ij}^P$  and  
 416  $\kappa_{ij}^Q$  (i.e.,  $\rho_{\text{mol}} = \mathbb{E}_{\bar{i}} [\sigma_{ij}^2 [\kappa_{ij}^P, \kappa_{ij}^Q]] / \sigma_{\text{mol}}^2$ ). To derive equation (12), we have assumed that  
 417 the variances of  $\langle \kappa_{\bar{i}\bar{j}}^c \rangle$  and  $\kappa_{ij}^c$  are independent of  $c$ ; i.e.,  $\sigma_{\text{cel}}^2 = \sigma_{\bar{i}}^2 [\langle \kappa_{\bar{i}\bar{j}}^c \rangle, \langle \kappa_{\bar{i}\bar{j}}^c \rangle]$  and  
 418  $\sigma_{\text{mol}}^2 = \mathbb{E}_{\bar{i}} [\sigma_{ij}^2 [\kappa_{ij}^c, \kappa_{ij}^c]]$  for  $c = P$  and  $c = Q$ .

419 Equation (12) can be expressed in a compact form as follows:

$$420 \quad \begin{bmatrix} \Delta \langle \kappa_{\bar{i}\bar{j}}^P \rangle \\ \Delta \langle \kappa_{\bar{i}\bar{j}}^Q \rangle \end{bmatrix} = \sigma_{\text{tot}}^2 \nabla [RB - (1 - R)C] + O'' ,$$

421 where  $\nabla$  is a nabla operator (i.e.,  $\nabla = [\partial/\partial \langle \kappa_{\bar{i}\bar{j}}^P \rangle, \partial/\partial \langle \kappa_{\bar{i}\bar{j}}^Q \rangle]^T$ , where  $^T$  denotes trans-  
 422 pose),  $\sigma_{\text{tot}}^2 = \sigma_{\text{mol}}^2 + \sigma_{\text{cel}}^2$ ,  $R = \sigma_{\text{cel}}^2 / (\sigma_{\text{cel}}^2 + \sigma_{\text{mol}}^2)$ ,  $B = (1 + \rho_{\text{cel}})(\kappa_{\bar{i}\bar{j}}^P + \kappa_{\bar{i}\bar{j}}^Q)$ , and  $C =$   
 423  $(\rho_{\text{mol}} - 1) \ln(e^{-s\kappa_{\bar{i}\bar{j}}^P} + e^{-s\kappa_{\bar{i}\bar{j}}^Q}) + \rho_{\text{mol}} s(\kappa_{\bar{i}\bar{j}}^P + \kappa_{\bar{i}\bar{j}}^Q)$ .  $R$  can be interpreted as the regression  
 424 coefficient of  $\langle \kappa_{\bar{i}\bar{j}}^c \rangle$  on  $\kappa_{ij}^c$ <sup>17</sup> and, therefore, the coefficient of genetic relatedness<sup>18,19</sup>.  
 425 The potential function  $RB - (1 - R)C$  can then be interpreted as inclusive fitness.

426 Next, we omit  $O''$  from equations (12), replace  $\Delta$  with time derivative  $d/d\tau$ , and  
 427 let  $\langle \kappa_{ij}^c \rangle$  be denoted by  $\bar{k}^c$ , obtaining

$$428 \quad \frac{d}{d\tau} \bar{k}^c = (1 + \rho_{\text{cel}}) \sigma_{\text{cel}}^2 - s \frac{e^{-s\bar{k}^c} + \rho_{\text{mol}} e^{-s\bar{k}^{c'}}}{e^{-s\bar{k}^{\text{P}}} + e^{-s\bar{k}^{\text{Q}}}} \sigma_{\text{mol}}^2. \quad (13)$$

429 Finally, to allow for the restriction on the range of  $\bar{k}^c$  (i.e.,  $\bar{k}^c \in [0, k_{\text{max}}]$ ), we  
 430 multiply the right-hand side of equation (13) with a function, denoted by  $\Theta(\bar{k}^c)$ ,  
 431 that is 1 if  $0 < \bar{k}^c < k_{\text{max}}$  and 0 if  $\bar{k}^c = 0$  or  $\bar{k}^c = k_{\text{max}}$ . Multiplying  $\Theta(\bar{k}^c)$  with the  
 432 right-hand side of equation (13), we obtain

$$433 \quad \frac{d}{d\tau} \bar{k}^c = \Theta(\bar{k}^c) \left[ (1 + \rho_{\text{cel}}) \sigma_{\text{cel}}^2 - s \frac{e^{-s\bar{k}^c} + \rho_{\text{mol}} e^{-s\bar{k}^{c'}}}{e^{-s\bar{k}^{\text{P}}} + e^{-s\bar{k}^{\text{Q}}}} \sigma_{\text{mol}}^2 \right].$$

434 The above equation was numerically integrated to obtain the phase-plane portrait  
 435 depicted in Fig. 3.

436 Equation (13) allows for statistical correlations between  $\kappa_{ij}^{\text{P}}$  and  $\kappa_{ij}^{\text{Q}}$  at the mo-  
 437 lecular and cellular levels, i.e.,  $\rho_{\text{mol}}$  and  $\rho_{\text{cel}}$ . Therefore, it can be used to examine the  
 438 consequence of ignoring these correlations, which is one of the simplifications made  
 439 in the derivation of equations (1). For this sake, we calculate the nullcline of  $\frac{d}{d\tau} \bar{k}^c$ .  
 440 From equation (13), we obtain

$$441 \quad \bar{k}^{c'} = \bar{k}^c + s^{-1} \ln \frac{\rho_{\text{mol}} s \sigma_{\text{mol}}^2 - (1 + \rho_{\text{cel}}) \sigma_{\text{cel}}^2}{(1 + \rho_{\text{cel}}) \sigma_{\text{cel}}^2 - s \sigma_{\text{mol}}^2}.$$

442 This equation shows that all parameters only appear in the intercept of the nullcline  
 443 with the  $\bar{k}^{c'}$ -axis. Let us denote this intercept as  $s^{-1} \ln I$ . The way  $I$  qualitatively  
 444 depends on  $\sigma_{\text{cel}}^2$  and  $s \sigma_{\text{mol}}^2$  is independent of  $\rho_{\text{cel}}$  because  $-1 < \rho_{\text{cel}} < 1$ . Therefore, we  
 445 can assume that  $\rho_{\text{cel}} = 0$  without loss of generality. Next, to see how  $\rho_{\text{mol}}$  influences  
 446  $I$ , we focus on the singularity of  $I$  by setting  $(1 + \rho_{\text{cel}}) \sigma_{\text{cel}}^2 = s \sigma_{\text{mol}}^2 + \epsilon$ , where  $\epsilon > 0$ .  
 447 Then,  $I = (1 - \rho_{\text{mol}}) s \sigma_{\text{mol}}^2 / \epsilon - \rho_{\text{mol}}$ . The way  $I$  qualitatively depends on  $s \sigma_{\text{mol}}^2 / \epsilon$  is  
 448 independent of  $\rho_{\text{mol}}$  because  $-1 < \rho_{\text{mol}} < 1$ . Therefore, we can assume that  $\rho_{\text{mol}} = 0$   
 449 without loss of generality. Taken together, these calculations show that ignoring  
 450 correlations between  $\kappa_{ij}^{\text{P}}$  and  $\kappa_{ij}^{\text{Q}}$  does not qualitatively affect the results, supporting  
 451 the validity of equations (1).

## 452 References

- 453 1. Crick, F. Central dogma of molecular biology. *Nature* **227**, 561–563 (1970).

- 454 2. *The RNA World* 3rd (eds Gesteland, R. F., Cech, T. & Atkins, J. F.) (Cold  
455 Spring Harbor Laboratory Press, Cold Spring Harbor, NY, 2006).
- 456 3. Joyce, G. F., Schwartz, A. W., Miller, S. L. & Orgel, L. E. The case for an  
457 ancestral genetic system involving simple analogues of the nucleotides. *Proceed-*  
458 *ings of the National Academy of Sciences of the United States of America* **84**,  
459 4398–4402 (1987).
- 460 4. Buss, L. W. *The Evolution of Individuality* (Princeton University Press, Prin-  
461 ceton, NJ, 1987).
- 462 5. Maynard Smith, J. & Szathmáry, E. *The Major Transitions in Evolution* (W.  
463 H. Freeman/Spektrum, Oxford, 1995).
- 464 6. Michod, R. E. *Darwinian Dynamics: Evolutionary Transitions in Fitness and*  
465 *Individuality* (Princeton University Press, Princeton, NJ, 1999).
- 466 7. Bourke, A. F. G. *Principles of Social Evolution* (Oxford University Press, Ox-  
467 ford, UK, 2011).
- 468 8. Takeuchi, N., Hogeweg, P. & Kaneko, K. The origin of a primordial genome  
469 through spontaneous symmetry breaking. *Nature Communications* **8**, 250 (2017).
- 470 9. Chen, I. A., Roberts, R. W. & Szostak, J. W. The emergence of competition  
471 between model protocells. *Science* **305**, 1474–1476 (2004).
- 472 10. Durand, P. M. & Michod, R. E. Genomics in the light of evolutionary trans-  
473 itions. *Evolution* **64**, 1533–1540 (2010).
- 474 11. Ivica, N. A. *et al.* The paradox of dual roles in the RNA world: resolving the  
475 conflict between stable folding and templating ability. *Journal of Molecular*  
476 *Evolution* **77**, 55–63 (2013).
- 477 12. Takeuchi, N. & Hogeweg, P. The role of complex formation and deleterious  
478 mutations for the stability of RNA-like replicator systems. *Journal of Molecular*  
479 *Evolution* **65**, 668–686 (2007).
- 480 13. Price, G. R. Selection and covariance. *Nature* **227**, 520–521 (1970).
- 481 14. Price, G. R. Extension of covariance selection mathematics. *Annals of Human*  
482 *Genetics* **35**, 485–490 (1972).
- 483 15. Hamilton, W. D. Innate social aptitudes of man: an approach from evolutionary  
484 genetics. in *Biosocial Anthoroplogy* (ed Fox, R) 133–153 (Malaby Press, London,  
485 1975).
- 486 16. Iwasa, Y., Pomiankowski, A. & Nee, S. The evolution of costly mate preferences  
487 II. the ‘handicap’ principle. *Evolution* **45**, 1431–1442 (1991).

- 488 17. Rice, S. H. *Evolutionary Theory: Mathematical and Conceptual Foundations*  
489 (Sinauer Associates, Sunderland, MA, USA, 2004).
- 490 18. Taylor, P. D. & Frank, S. A. How to make a kin selection model. *Journal of*  
491 *Theoretical Biology* **180**, 27–37 (1996).
- 492 19. Levin, S. & West, S. Kin selection in the RNA world. *Life* **7**, 53 (2017).
- 493 20. Takeuchi, N., Kaneko, K. & Hogeweg, P. Evolutionarily stable disequilibrium:  
494 Endless dynamics of evolution in a stationary population. *Proceedings of the*  
495 *Royal Society B* **283**, 20153109 (2016).

## 496 **Supplementary Information**

497 Extended Data Figures and Supplementary Discussion are included in this manu-  
498 script.

## 499 **Acknowledgements**

500 The authors have been supported by JSPS KAKENHI (grant number JP17K17657  
501 and JP17H06386). NT has been supported by the University of Tokyo through the  
502 national university reform and strengthening project.

## 503 **Author Contributions**

504 N.T. conceived the study, designed, implemented and analysed the models, and wrote  
505 the paper. K.K. discussed the design, results and implications of the study, and  
506 commented on the manuscript at all stages.

## 507 **Author Information**

508 The authors declare no competing financial interests. Correspondence and requests  
509 for materials should be addressed to nobuto.takeuchi@auckland.ac.nz.

## 510 **Code availability**

511 The C++ source codes implementing the models are available from the corresponding  
512 author upon request.

513 **Data availability**

514 The authors declare that the data supporting the findings of this study are available  
515 within the paper and Extended Data Figures.

516 **Extended Data**

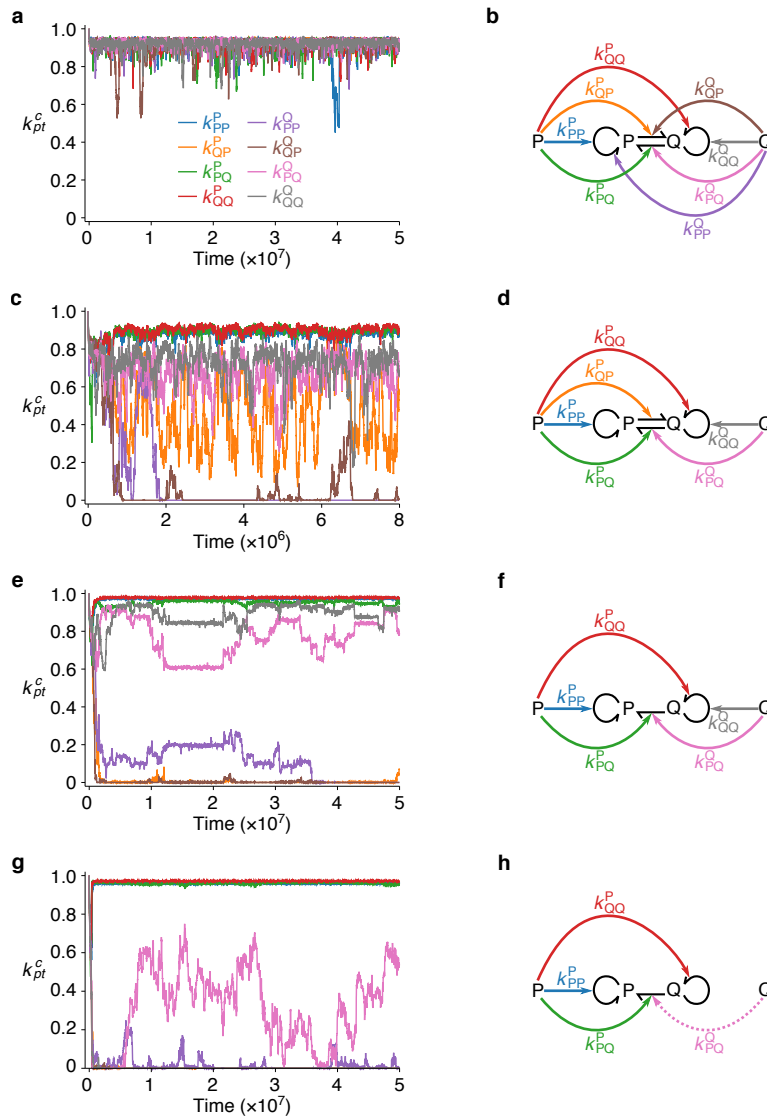

517 **Extended Data Figure 1: The evolutionary dynamics of the model.** **a**, The  
 518 dynamics of  $k_{pt}^c$  averaged over all replicators for parameters corresponding to ‘no  
 519 symmetry breaking’ in Fig. 2a:  $V = 178$  and  $m = 0.01$ . **b**, Replicators evolving in **a**.  
 520 **c**, **d**, Parameters corresponding to ‘uncategorised’ in Fig. 2a:  $V = 178$  and  $m = 0.1$ . **e**,  
 521 **f**, Parameters corresponding to ‘incomplete symmetry breaking’ in Fig. 2a:  $V = 562$   
 522 and  $m = 0.01$  **g**, **h**, Parameters corresponding to ‘incomplete symmetry breaking’ in  
 523 Fig. 2a:  $V = 1778$  and  $m = 0.01$ .

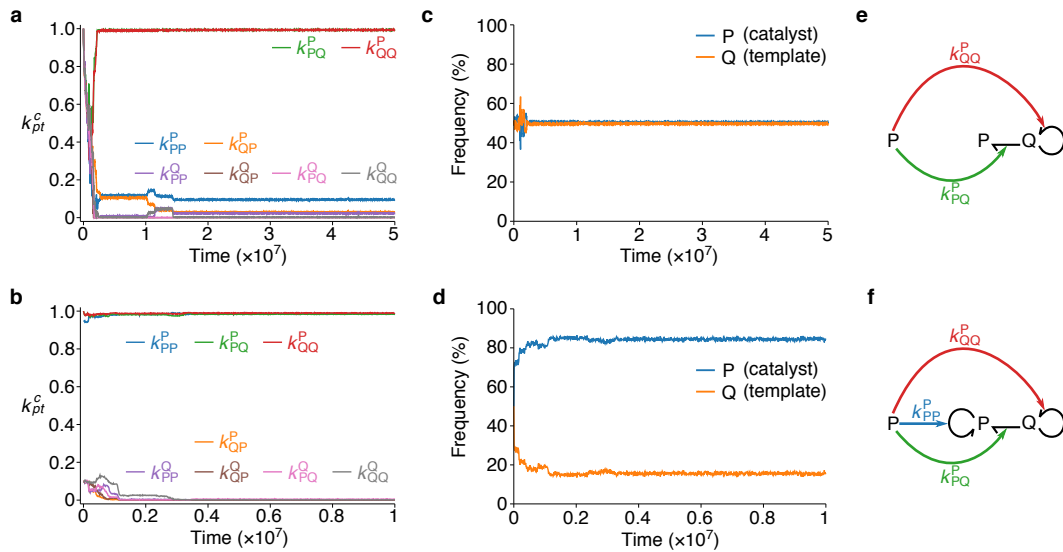

524 Extended Data Figure 2: **The absence of numerical symmetry breaking for**  
 525 **small  $m$  and large  $V$ .** **a, b**, The dynamics of  $k_{pt}^c$  averaged over all replicators is  
 526 shown for  $V = 10000$  and  $m = 0.001$  with two different initial conditions: a symmetric  
 527 initial condition, where  $k_{pt}^c = 1$  (a); an asymmetric initial condition, where  $k_{PP}^P = 0.95$ ,  
 528  $k_{PQ}^P = 0.1$ ,  $k_{QP}^P = 1$ ,  $k_{QQ}^P = 1$ , and  $k_{pt}^Q = 0.1$  (b). The self-replication of catalysts  
 529 does not evolve for the symmetric initial condition, whereas it is maintained for the  
 530 asymmetric initial condition ( $t_{\min} > 1.2 \times 10^7$ ). The dependence of the results on  
 531 the initial conditions suggests the presence of bistability for  $V = 10000$  and  $m =$   
 532  $0.001$ . **c, d**, The frequencies of P (catalysts) and Q (templates) are plotted as the  
 533 functions of time. Numerical symmetry breaking does not occur for the symmetric  
 534 initial condition, whereas it occurs for the asymmetric initial condition. The results  
 535 indicate that numerical asymmetry depends on the self-replication of catalysts. **e, f**,  
 536 Replicators evolving for the symmetric initial condition (e) and for the asymmetric  
 537 initial condition (f).



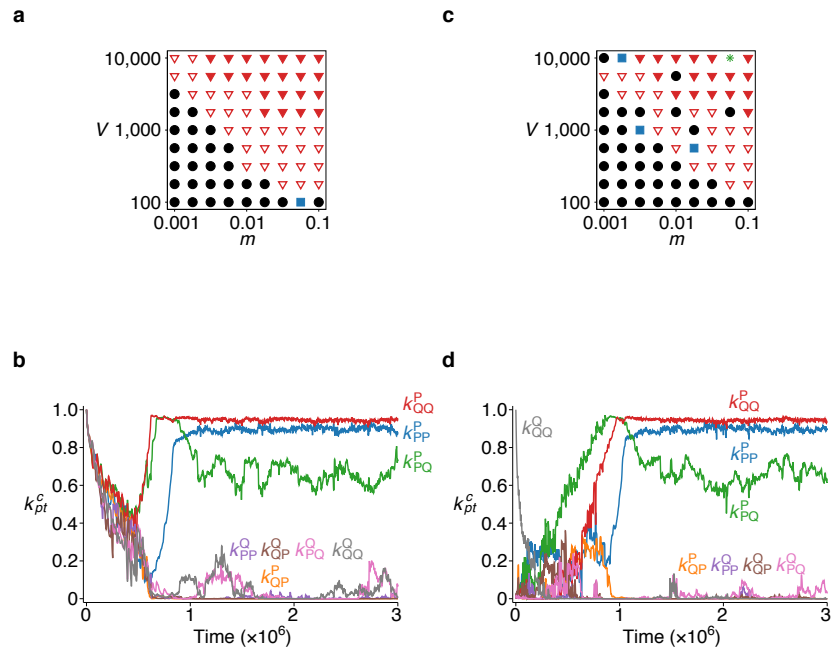

538 Extended Data Figure 3: **Symmetry breaking with an alternative definition of**  
 539 **complex formation rates.** The rate constants of complex formation were defined  
 540 in such a way that coexistence between P and Q is neither favoured nor disfavoured  
 541 by cellular-level selection (see Supplementary Discussion 2). **a**, Phase diagram with  
 542 a symmetric initial condition:  $k_{pt}^c = 1$  for all combinations of  $c$ ,  $p$ , and  $t$ , with both  
 543 P and Q present at the beginning of each simulation. The symbols are the same  
 544 as in Fig. 2a, except that the circles include cases in which one replicator type goes  
 545 extinct. **b**, Dynamics of  $k_{pt}^c$  averaged over all replicators for  $m = 0.01$  and  $V = 10000$   
 546 in a. **c**, Phase diagram with an asymmetric initial condition:  $k_{QQ}^Q = 1$  and  $k_{pt}^c = 0$   
 547 for all the other combinations of  $c$ ,  $p$ , and  $t$ , with only Q present at the beginning  
 548 of each simulation. The symbols are the same as in a, except that stars indicate the  
 549 extinction of replicators. **d** Dynamics of  $k_{pt}^c$  averaged over all replicators for  $m = 0.01$   
 550 and  $V = 10000$  in b.

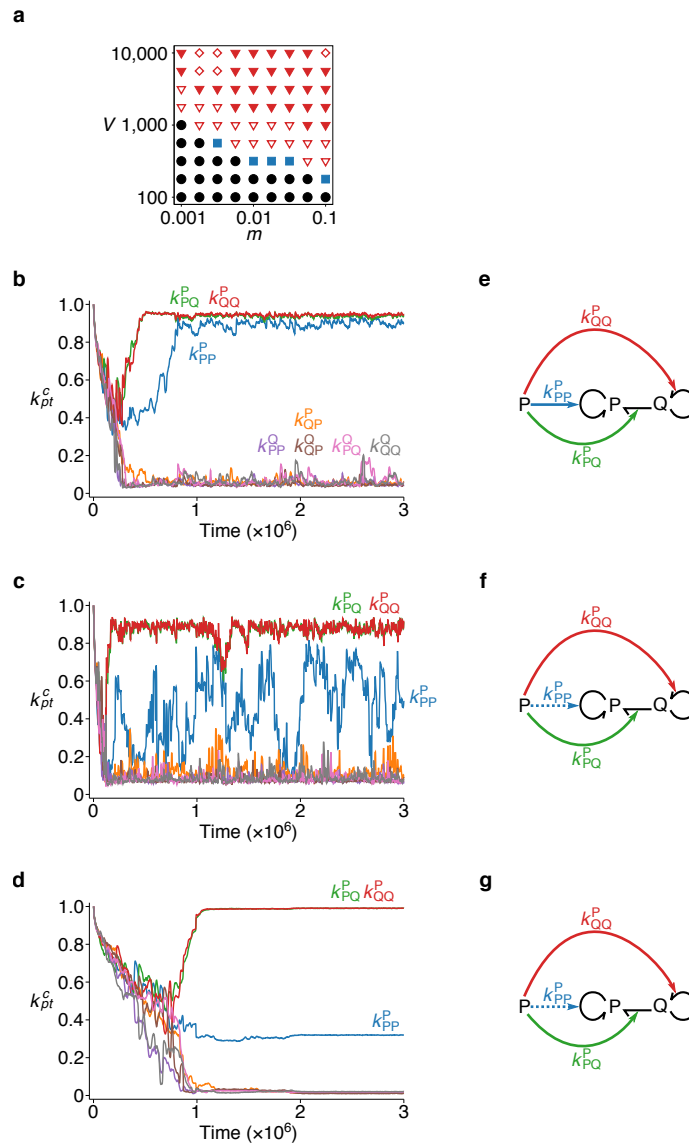

551 Extended Data Figure 4: **Symmetry breaking with reflecting mutation.** The  
 552 mutation of  $k_{pt}^c$  is modelled as unbiased random walk with reflecting boundaries at  
 553 0 and 1 (see Supplementary Discussion 3). **a**, Phase diagram. The symbols are the  
 554 same as in Fig. 2a ( $t_{\min} > 3.9 \times 10^7$  for  $m = 0.1$  and  $V = 10000$ ). **b** Dynamics of  
 555  $k_{pt}^c$  averaged over all replicators.  $m = 0.01$  and  $V = 10000$ . Three-fold symmetry  
 556 breaking occurs. **c**,  $m = 0.0562$  and  $V = 10000$ . Numerical symmetry breaking is  
 557 slight. **d**,  $m = 0.00178$  and  $V = 10000$ . Numerical symmetry breaking is slight. **e, f,**  
 558 **g**, Replicators evolving in b, c, d, respectively.

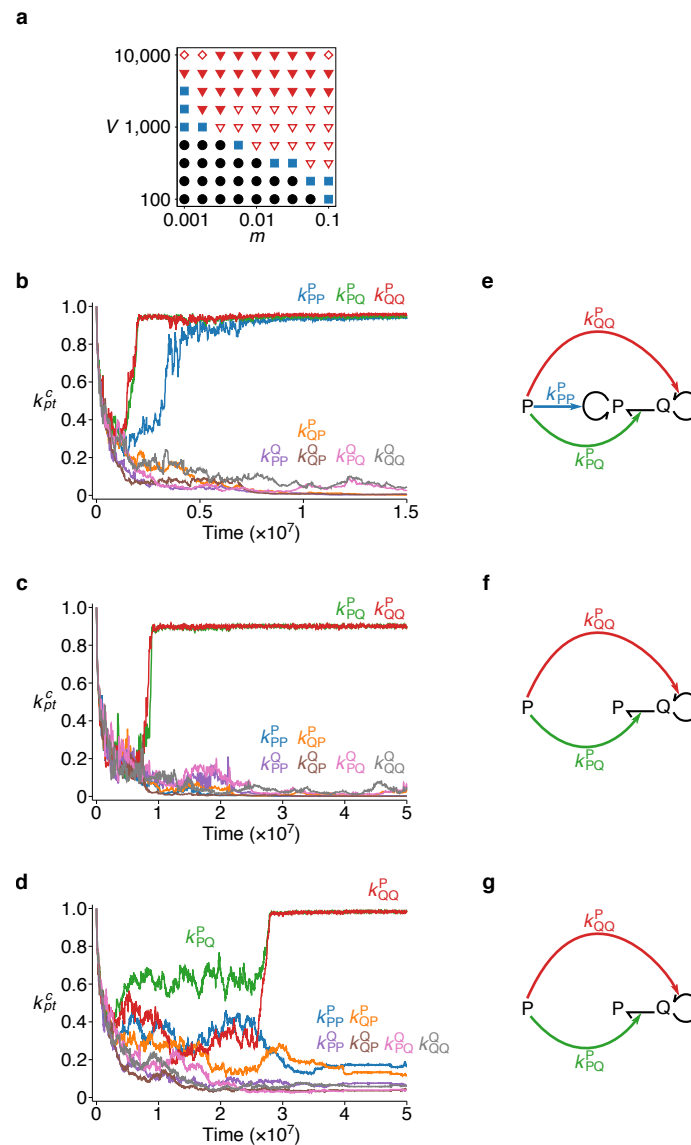

559 Extended Data Figure 5: **Symmetry breaking with log-space mutation.** The  
 560 mutation of  $k_{pt}^c$  is modelled as unbiased random walks on a logarithmic scale (see  
 561 Supplementary Discussion 3). **a**, Phase diagram. The symbols are the same as in  
 562 Fig. 2a ( $t_{\min} > 3.9 \times 10^7$  only for  $m = 0.1$  and  $V = 10000$ ). **b**, Dynamics of  $k_{pt}^c$  averaged  
 563 over all replicators.  $m = 0.01$  and  $V = 10000$ . Three-fold symmetry breaking occurs.  
 564 **c**,  $m = 0.1$  and  $V = 10000$ . No numerical symmetry breaking occurs. **d**,  $m = 0.00178$   
 565 and  $V = 10000$ . No numerical symmetry breaking occurs. **e**, **f**, **g**, Replicators evolving  
 566 in b, c, d, respectively.

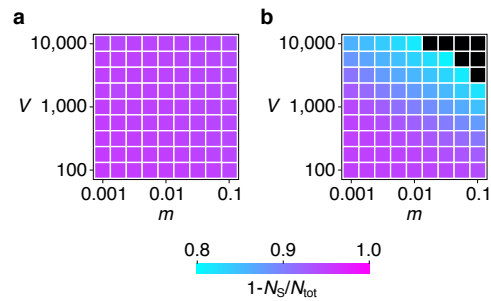

567 Extended Data Figure 6: **The effect of symmetry breaking on catalytic activ-**  
568 **ities.** The fraction of replicators  $1 - N_S / N_{\text{tot}}$ , which is a proxy for the overall catalytic  
569 activity of replicators, is shown as a function of  $m$  and  $V$ , where  $N_S$  is the total num-  
570 ber of S molecules in the system, and  $N_{\text{tot}} = N_P + N_Q + N_S$ . **a**, The original model,  
571 which allows symmetry breaking (Fig. 1). **b**, The model which excludes the possib-  
572 ility of symmetry breaking; specifically, it allows only one type of replicator (either  
573 P or Q). Black squares indicate extinction (i.e.  $N_{\text{tot}} = N_S$ ).  $t_{\text{min}} > 1.5 \times 10^7$ .

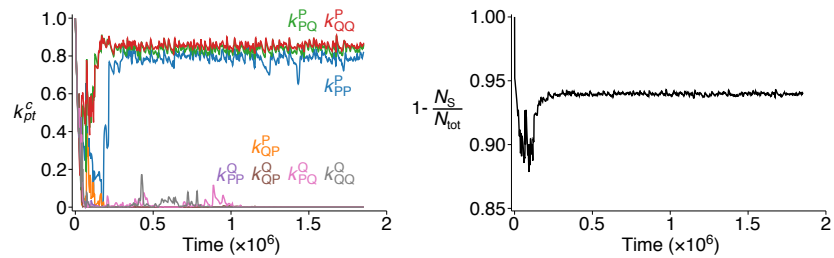

574 Extended Data Figure 7: **Result for large  $m$  and  $V$  values.** The dynamics of the  
575 simulation model is shown for  $m = 0.1$  and  $V = 10^5$ , parameters outside the range  
576 examined in Fig. 2a and Extended Data Fig. 6. **a**, The dynamics of  $k_{pt}^c$  averaged over  
577 all replicators. **b**, The dynamics of the fraction of replicators  $1 - N_S/N_{tot}$ , where  $N_{tot}$   
578 and  $N_S$  are the total numbers of particles and S molecules in the system, respectively.  
579  $t_{min} > 1.8 \times 10^6$ .

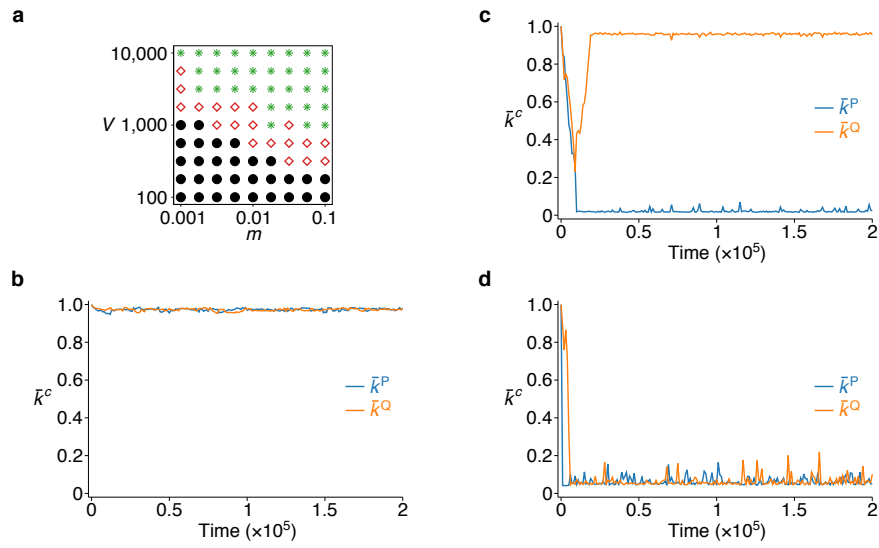

580 Extended Data Figure 8: **Symmetry breaking in a hierarchical Wright-Fisher**  
 581 **model.** The model stochastically simulates the population dynamics described by  
 582 equations (1), treating  $\sigma_{\text{mol}}^2$  and  $\sigma_{\text{cel}}^2$  as variables dependent on  $m$  and  $V$  (see Sup-  
 583 plementary Discussion 5). **a**, Phase diagram. Circles indicate no symmetry breaking  
 584 (i.e.,  $\bar{k}^P \approx \bar{k}^Q \approx 1$ ); diamonds, symmetry breaking (i.e.,  $\bar{k}^c \approx 0$  and  $\bar{k}^{c'} \approx 1$  for  $c \neq c'$ );  
 585 stars, extinction (i.e.,  $\bar{k}^P \approx \bar{k}^Q \approx 0$ ).  $s = 1$  (cost-benefit ratio). The total number  
 586 of replicators was  $50V$  (approximately 130 protocells throughout simulations). The  
 587 initial condition was  $k^P = k^Q = 1$  for all replicators. Each simulation was run for  
 588  $4 \times 10^5$  generations **b**, The dynamics of  $\bar{k}^c$  for  $m = 0.001$  and  $V = 1000$  (no symmetry  
 589 breaking). **c**,  $m = 0.01$  and  $V = 1000$  (symmetry breaking). **d**,  $m = 0.1$  and  $V = 1000$   
 590 (extinction).

| hierarchy              |                         | differentiation |                  |
|------------------------|-------------------------|-----------------|------------------|
| whole                  | parts                   | reproductive    | non-reproductive |
| cell                   | molecules               | genome          | enzyme           |
| symbiont population*   | prokaryotic cells       | transmitted     | non-transmitted  |
| ciliate                | organelles              | micronucleus    | macronucleus     |
| multicellular organism | eukaryotic cells        | germ            | soma             |
| eusocial colony        | multicellular organisms | queen           | worker           |

591 Extended Data Table 1: **Differentiation between reproductive and non-reproductive**  
592 **elements is a universal property of life.** \*Bacterial symbionts of ungulate lice  
593 (*Haematopinus*) and planthoppers (*Fulgoroidea*)<sup>21</sup>.



## 594 Supplementary Discussion

### 595 1. On the the chemical identity of P and Q

596 The present study formulates the central dogma in functional (as opposed to chem-  
597 ical) terms as the one-way flow of information from non-catalytic molecules to cata-  
598 lytic molecules. This formulation is advantageous for simplicity and generally as  
599 mentioned in the main text. In particular, it makes our theory independent of the  
600 chemical details of replicating molecules. For example, our theory assumes that a  
601 molecule faces a trade-off between catalysing and templating, but it does not re-  
602 strict catalysis to being replicase activity (although our simulation model explicitly  
603 assumes that catalysts are replicases, our mathematical theory based on equation (1)  
604 does not make this assumption). Therefore, our theory offers a great degree of free-  
605 dom for experimental testing. One possibility for such experiments might be to use  
606 RNA and DNA to embody P and Q of our theory, given the availability of various  
607 catalytic RNA and DNA molecules<sup>22-24</sup>. In addition, using RNA and DNA is poten-  
608 tially relevant to the historical origin of the central dogma, given the possibility that  
609 DNA might have emerged before the advent of proteins<sup>25-28</sup>.

### 610 2. Model in which coexistence between P and Q is selectively 611 neutral

612 In the simulation model described in the main text, the reaction rate constants of  
613 complex formation are defined as the  $k_{pt}^c$  values of a replicator serving as a catalyst.  
614 Under this definition, coexistence between P and Q is favoured by cellular-level  
615 selection because replicators multiply fastest if their  $k_{pt}^c$  values are maximised for  
616 all combinations of  $c$ ,  $p$ , and  $t$ , as described in Methods. To ascertain that this  
617 specific aspect of the model does not critically affect results, we additionally examined  
618 an alternative model in which cellular-level selection neither favours nor disfavors  
619 coexistence between P and Q.

620 In this alternative model, the reaction rate constants of complex formation are  
621 defined as a function of the  $k_{pt}^c$  values of a replicator serving as a catalyst as follows:

$$622 \max(k_{Pt}^c, k_{Qt}^c) \frac{k_{pt}^c}{k_{Pt}^c + k_{Qt}^c}.$$

623 Under this definition, two replicators, denoted by  $X$  and  $Y$ , form a complex at a rate  
624 proportional to  $\max(k_{Py}^x, k_{Qy}^x) + \max(k_{Px}^y, k_{Qx}^y) \leq 2k_{\max}$  if all possible complexes are  
625 considered, where  $x$  and  $y$  are the replicator types of  $X$  and  $Y$ , respectively (note

626 that in the original simulation model, this rate is proportional to  $\sum_p k_{py}^x + k_{px}^y \leq 4k_{\max}$ .  
627 Accordingly, replicators multiply fastest not only if  $k_{pt}^c = k_{\max}$  for all combinations of  
628  $c$ ,  $p$ , and  $t$ , but also if  $k_{cc}^c = k_{\max}$  for either  $c = P$  or  $c = Q$  and  $k_{pt}^c = 0$  for all the other  
629 combinations. Therefore, coexistence between P and Q is not necessarily favoured  
630 by cellular-level selection.

631 To examine the effect of coexistence between P and Q on symmetry breaking, we  
632 simulated the alternative model described above with two initial conditions, symmet-  
633 ric and asymmetric. In the symmetric initial condition, both P and Q were present.  
634 In the asymmetric initial condition, only Q was present. For both initial conditions,  
635 the model displays the same symmetry breaking as displayed by the original model  
636 (Extended Data Fig. 3).

### 637 3. Alternative models for the mutation of $k_{pt}^c$

638 In the simulation model described in the main text, the mutation of  $k_{pt}^c$  is modelled as  
639 unbiased random walks in a half-open interval  $(-\infty, k_{\max})$  with a reflecting boundary  
640 at  $k_{pt}^c = k_{\max}$ . To ascertain that this specific model of mutation does not critically  
641 affect results, we additionally examined two alternative models of mutation. The  
642 first alternative model is nearly the same as the model described in the main text,  
643 except that the boundary condition at  $k_{pt}^c = 0$  is set to reflecting. In the second  
644 alternative model, each  $k_{pt}^c$  value is mutated by multiplying  $\exp(\epsilon)$ , where  $\epsilon$  is a  
645 number randomly drawn from a uniform distribution on the interval  $(-\delta_{\text{mut}}, \delta_{\text{mut}})$ ,  
646 with a reflecting boundary at  $k_{pt}^c = k_{\max}$ . Both models of mutation produce essentially  
647 the same result as described in the main text (Extended Data Figs. 4 and 5)

### 648 4. Numerical symmetry breaking

649 In this section, we show that numerical symmetry breaking occurs because it is  
650 favoured by cellular-level selection in the presence of catalytic and informatic asym-  
651 metry and neither favoured nor disfavoured by molecular-level selection. To this end,  
652 we will use a similar mathematical framework as used to derive equations (1) (see  
653 Methods).

654 The proximate—as opposed to ultimate—cause of numerical symmetry breaking  
655 is the self-replication of catalysts (i.e.,  $k_{cc}^c > 0$ ). This fact can be inferred from  
656 the following two results. First, when catalytic, informatic, and numerical symmetry  
657 breaking occurs, the replication and transcription of templates are catalysed at about  
658 the same rate, i.e.,  $k_{tt}^c \approx k_{ct}^c$  (Fig. 2b). Therefore, the replication and transcription of  
659 templates cannot cause numerical asymmetry. Second, when catalytic and informatic

660 symmetry breaking occurs without numerical symmetry breaking, the self-replication  
 661 of catalysts is absent (Extended Data Fig. 2). Taken together, these results indicate  
 662 that the proximate cause of numerical symmetry breaking is the self-replication of  
 663 catalysts. Therefore, to understand why numerical symmetry breaking occurs, we  
 664 need to understand why the self-replication of catalysts evolves.

665 To address this question, we assume that replicators have already undergone  
 666 catalytic and informatic symmetry breaking and consider how the fitness of those  
 667 replicators depends on the self-replication of catalysts. The population dynamics of  
 668 replicators with catalytic and informatic asymmetry can be described as follows. Let  
 669  $n_{ij}^t(\tau)$  be the population size of replicator  $j$  of type  $t$  in protocell  $i$  at time  $\tau$ . Let  
 670 catalysts and templates be P and Q, respectively. Then, the dynamics of  $n_{ij}^t(\tau)$  is  
 671 mathematically described as follows:

$$\begin{bmatrix} n_{ij}^P(\tau + 1) \\ n_{ij}^Q(\tau + 1) \end{bmatrix} = \begin{bmatrix} w_{ij}^{PP} & \omega_{ij}^Q \\ 0 & \omega_{ij}^Q \end{bmatrix} \begin{bmatrix} n_{ij}^P(\tau) \\ n_{ij}^Q(\tau) \end{bmatrix}, \quad (14)$$

672 where  $w_{ij}^{PP}$  is the self-replication probability of catalysts, and  $\omega_{ij}^Q$  is the replication  
 673 and transcription probabilities of templates, which are assumed to be identical to  
 674 each other. The fitness of replicators can be defined as the dominant eigenvalue  
 675 (denoted by  $\lambda_{ij}$ ) of the  $2 \times 2$  matrix on the right-hand side of equation (14):

$$\lambda_{ij} = \begin{cases} \omega_{ij}^Q & \text{if } \omega_{ij}^Q > w_{ij}^{PP} \\ w_{ij}^{PP} & \text{otherwise.} \end{cases} \quad (15)$$

676 The associated right eigenvector, which determines the stationary frequencies of P  
 677 and Q, is

$$\mathbf{v}_{ij} = \begin{cases} \frac{1}{2 - w_{ij}^{PP}/\omega_{ij}^Q} \begin{bmatrix} 1 \\ 1 - w_{ij}^{PP}/\omega_{ij}^Q \end{bmatrix} & \text{if } \omega_{ij}^Q > w_{ij}^{PP} \\ \begin{bmatrix} 1 \\ 0 \end{bmatrix} & \text{otherwise.} \end{cases} \quad (16)$$

678 Equation (16) shows that we must assume  $\omega_{ij}^Q > w_{ij}^{PP}$  in order for P and Q to coex-  
 679 ist. Equation (16) also shows that the frequency of catalysts (i.e.,  $(2 - w_{ij}^{PP}/\omega_{ij}^Q)^{-1}$ )  
 680 increases with the self-replication of catalysts (i.e.,  $w_{ij}^{PP}$ ), as stated in the beginning  
 681 of this section.

682 We first examine whether the self-replication of catalysts is favoured by molecular-  
 683 level selection. To this end, we consider how the fitness of replicators (i.e.,  $\lambda_{ij}$ )

684 depends on the self-replication of catalysts (i.e.,  $w_{ij}^{PP}$ ). According to equation (15),  $\lambda_{ij}$   
685 is not directly dependent on  $w_{ij}^{PP}$ . However,  $\lambda_{ij}$  can indirectly depend on  $w_{ij}^{PP}$  because  
686  $\lambda_{ij}$  increases with the frequency of catalysts in a protocell (i.e.,  $\mathbb{E}_{i\tilde{j}}[(2 - w_{i\tilde{j}}^{PP}/\omega_{i\tilde{j}}^Q)^{-1}]$ ).  
687 This frequency can increase with  $w_{ij}^{PP}$  if  $V$  is so small that a particular replicator  
688 can influence the frequency of catalysts in the protocell. However, if  $\lambda_{ij}$  increases  
689 with  $w_{ij}^{PP}$ , the average fitness of replicators in the protocell (i.e.,  $\langle \lambda_{i\tilde{j}} \rangle$ ) must also  
690 increase. Therefore, we need to consider the relative fitness (i.e.,  $\lambda_{ij}/\langle \lambda_{i\tilde{j}} \rangle$ ). The  
691 relative fitness is independent of  $w_{ij}^{PP}$  because catalysis is equally shared among  
692 templates within a protocell. Therefore, the self-replication of catalysts is neither  
693 favoured nor disfavoured by molecular-level selection.

694 We next examine whether the self-replication of catalysts is favoured by cellular-  
695 level selection. To this end, we consider how the fitness of a protocell depends on  
696 the average self-replication of catalysts in that protocell (i.e.,  $\langle w_{i\tilde{j}}^{PP} \rangle$ ). The fitness of  
697 a protocell can be defined as the average fitness of the replicators in that protocell  
698 (i.e.,  $\langle \lambda_{i\tilde{j}} \rangle$ ). Thus, the fitness of a protocell increases with the frequency of catalysts  
699 in that protocell (i.e.,  $\mathbb{E}_{i\tilde{j}}[(2 - w_{i\tilde{j}}^{PP}/\omega_{i\tilde{j}}^Q)^{-1}]$ ), which in turn increases with  $\langle w_{i\tilde{j}}^{PP} \rangle$ .  
700 Therefore, the self-replication of catalysts is favoured by cellular-level selection.

701 Taken together, the above considerations indicate that the self-replication of cata-  
702 lysts is neutral with respect to molecular-level selection, but advantageous with re-  
703 spect to cellular-level selection. Therefore, numerical symmetry breaking results from  
704 the maximisation of fitness at the cellular level in the presence of genome-enzyme  
705 differentiation.

706 Finally, we add two general remarks about numerical symmetry breaking. First,  
707 numerical symmetry breaking is always observed in the systems displaying the divi-  
708 sion of labour between the transmission of genetic information and the other func-  
709 tions (Extended Data Table 1); e.g., the number of germ-line cells is smaller than  
710 that of somatic cells per organism, and the number of queens is smaller than that of  
711 workers per colony<sup>4-7</sup>. Numerical symmetry breaking can therefore be considered as  
712 an integral aspect of the reproductive division of labour although it is not considered  
713 as such in the central dogma.

714 Second, the important consequence of numerical symmetry breaking is that it  
715 causes a bottleneck effect on the population of replicators within a protocell. This  
716 bottleneck effect increases among-cell variance relative to within-cell variance (i.e.,  
717  $\sigma_{\text{cel}}^2/\sigma_{\text{mol}}^2$ ); therefore, it has a stabilising effect on protocells<sup>8,29</sup>. In this regard, nu-  
718 merical symmetry breaking can be compared to life-cycle bottlenecks displayed by  
719 multicellular organisms and eusocial colonies (i.e., an organism or colony develops  
720 from only one or a few propagules), which are considered to reduce within-group

721 conflict<sup>5-7</sup>.

## 722 5. The hierarchical Wright-Fisher model

723 Although the simplifications involved in the derivation of equations (1) allow us  
724 to elucidate the mechanism of symmetry breaking, they also make the comparison  
725 between equations (1) and the simulation model indirect. Specifically, equations (1)  
726 cannot be compared with the simulation model in terms of the same parameters,  
727 because the former treat  $\sigma_{\text{mol}}^2$  and  $\sigma_{\text{cel}}^2$  as parameters, which are actually variables  
728 dependent on  $m$  and  $V$  in the latter. To fill this gap, we constructed a model that  
729 stochastically simulates the population dynamics described by equations (1), but  
730 nevertheless treats  $\sigma_{\text{mol}}^2$  and  $\sigma_{\text{cel}}^2$  as variables dependent on  $m$  and  $V$ .

731 This model is formulated as a hierarchical Wright-Fisher process. Replicators  
732 are partitioned into a number of groups (hereafter, protocells). Each replicator is  
733 individually assigned replicator type  $c \in \{P, Q\}$  and two  $k^c$  values. The fitness of a  
734 replicator is calculated according to equation (11). In each generation, replicators are  
735 replicated or transcribed with probabilities proportional to  $\omega_{ij}^c$ , so that the population  
736 dynamics matches equation (2) on average. After the replication-transcription step,  
737 the protocells containing greater than  $V$  replicators are divided with their replicators  
738 randomly distributed between the two daughter cells. The protocells containing no  
739 replicators are discarded.

740 The mutation of  $k^c$  is modelled as unbiased random walks with reflecting bound-  
741 aries. With a probability  $m$  per replication or transcription, each  $k^c$  value of a  
742 replicator is mutated by adding a number randomly drawn from a uniform distribu-  
743 tion on the interval  $(-\delta_{\text{mut}}, \delta_{\text{mut}})$  ( $\delta_{\text{mut}} = 0.1$ ). The values of  $k^c$  are bounded in  $[0, 1]$   
744 with reflecting boundaries at both bounds.

745 To determine the condition for symmetry breaking, we simulated the above  
746 Wright-Fisher model for various values of  $V$  and  $m$ . The simulations show that  
747 symmetry breaking occurs only if  $V$  and  $m$  are sufficiently large (Extended Data  
748 Fig. 8), a result that is consistent with the outcomes of the original simulation model  
749 (Fig. 2). Given that the Wright-Fisher model involves many of the simplifications in-  
750 volved in equations (1), the above consistency supports the validity of the symmetry  
751 breaking mechanism described by equations (1).

## 752 References

- 753 21. Frank, S. A. Host control of symbiont transmission: the separation of symbionts  
754 into germ and soma. *The American Naturalist* **148**, 1113–1124 (1996).

- 755 22. Silverman, S. K. Catalytic DNA: scope, applications, and biochemistry of deoxyri-  
756 bozymes. *Trends in Biochemical Sciences* **41**, 595–609 (2016).
- 757 23. Müller, S., Appel, B., Balke, D., Hieronymus, R. & Nübel, C. Thirty-five years  
758 of research into ribozymes and nucleic acid catalysis: where do we stand today?  
759 *F1000Research* **5**, 1511 (2016).
- 760 24. Samanta, B. & Joyce, G. F. A reverse transcriptase ribozyme. *eLife* **6**, e31153  
761 (2017).
- 762 25. Powner, M. W., Zheng, S.-L. & Szostak, J. W. Multicomponent assembly of  
763 proposed DNA precursors in water. *Journal of the American Chemical Society*  
764 **134**, 13889–13895 (2012).
- 765 26. Poole, A. M. *et al.* The case for an early biological origin of DNA. *Journal of*  
766 *Molecular Evolution* **79**, 204–212 (2014).
- 767 27. Ritson, D. J. & Sutherland, J. D. Conversion of biosynthetic precursors of RNA  
768 to those of DNA by photoredox chemistry. *Journal of Molecular Evolution* **78**,  
769 245–250 (2014).
- 770 28. Gavette, J. V., Stoop, M., Hud, N. V. & Krishnamurthy, R. RNA-DNA chimeras  
771 in the context of an RNA world transition to an RNA/DNA world. *Angewandte*  
772 *Chemie International Edition*, 13204–13209.
- 773 29. Kaneko, K. & Yomo, T. On a kinetic origin of heredity: minority control in  
774 a replicating system with mutually catalytic molecules. *Journal of Theoretical*  
775 *Biology* **214**, 563–576 (2002).
